# Supplementary material for: Testing long-term summer temperature reconstruction based on maximum density chronologies obtained by reanalysis of tree-ring data sets from northernmost Sweden and Finland
Source: Copernicus journal article supplement (doi:10.5194/cp-10-1473-2014), 2014-08-05
Supplement: Supplementary file 1 [file cp-10-1473-2014-supplement.zip]

Archive with 3 entries (3 files):
- Supplementary information.pdf
- rec_with_uncertainties.xls
- supplement-cover-letter.pdf
