# Supplementary material for: Testing long-term summer temperature reconstruction based on maximum density chronologies obtained by reanalysis of tree-ring data sets from northernmost Sweden and Finland
Source: Copernicus journal article supplement (doi:10.5194/cp-10-1473-2014), 2014-08-05
Supplement: Supplementary file 1 [file rec_with_uncertainties.xls]

## Sheet: Лист1
Years	JJA temperature reconstruction	Uncertainty #1 2.5%	Uncertainty #1 97.5%	Uncertainties #1+2 2.5%	Uncertainties #1+2 97.5%	Uncertainties #1+2+3 2.5%	Uncertainties #1+2+3 97.5%
-7	13.609	13.4637	13.7448	12.9156	14.2536	12.1899	14.9276
-6	15.7987	15.6242	15.963	15.1326	16.4759	15.0322	18.1996
-5	14.7997	14.6363	14.9532	13.9587	15.6392	13.6713	16.9639
-4	15.0538	14.8785	15.2227	14.2557	15.7605	14.0253	17.1402
-3	16.0181	15.8328	16.1959	15.2191	16.7895	15.1307	18.6539
-2	15.6329	15.4535	15.8052	15.0473	16.2627	14.9343	17.8837
-1	15.7235	15.5478	15.8927	15.1271	16.345	15.0262	18.0068
0	14.885	14.7234	15.0391	13.9618	15.8794	13.676	17.3143
1	14.3128	14.1598	14.4599	13.5349	15.1085	13.0915	16.1844
2	14.7261	14.5668	14.8797	14.0574	15.4971	13.7908	16.7533
3	15.3798	15.2112	15.5419	14.5752	16.235	14.3966	17.8422
4	15.5873	15.4179	15.7496	15.0159	16.2183	14.8976	17.8172
5	14.7404	14.5839	14.8907	14.1258	15.3476	13.8729	16.5301
6	15.326	15.1597	15.4853	14.724	15.9573	14.5643	17.4319
7	14.5836	14.428	14.7322	14.0161	15.1848	13.7419	16.2954
8	12.9321	12.7967	13.0616	12.3408	13.5236	11.3449	13.8721
9	12.6176	12.4883	12.7407	12.0348	13.1188	10.8973	13.3556
10	11.596	11.4766	11.7093	11.2338	11.927	9.71983	11.992
11	12.4625	12.3389	12.5787	11.8787	12.9986	10.6698	13.2135
12	13.455	13.3171	13.584	12.5737	14.377	11.6872	15.1064
13	13.4692	13.3294	13.6003	12.7386	14.167	11.9301	14.8009
14	13.0132	12.8793	13.14	12.1299	13.8628	11.0363	14.3542
15	14.0392	13.8933	14.1779	12.9917	15.0618	12.3019	16.117
16	14.554	14.4046	14.6981	13.5682	15.4918	13.1407	16.7454
17	13.0806	12.9463	13.2103	11.857	14.2509	10.6382	14.9237
18	13.7876	13.6417	13.9271	12.4988	14.9915	11.5768	16.0133
19	14.3467	14.1962	14.49	13.2856	15.3313	12.7323	16.5067
20	12.9388	12.8021	13.0711	12.0504	13.873	10.9202	14.3685
21	13.288	13.1477	13.4235	12.8336	13.7905	12.0691	14.2503
22	14.2822	14.1295	14.4301	13.3663	15.2441	12.8476	16.3798
23	14.4784	14.3219	14.6309	13.7166	15.2751	13.3528	16.4239
24	14.0846	13.9375	14.2282	12.9912	15.0822	12.3013	16.146
25	14.5171	14.364	14.6674	13.5719	15.3592	13.1461	16.5469
26	14.5467	14.3891	14.7026	13.4178	15.6839	12.9231	17.0286
27	15.5417	15.3721	15.7101	14.6305	16.3982	14.4584	18.0864
28	15.1444	14.9776	15.3125	14.1789	16.1028	13.9354	17.6458
29	14.3304	14.1743	14.4879	13.7422	14.9084	13.3877	15.8914
30	15.1985	15.0287	15.3692	14.2022	16.2697	13.964	17.8941
31	15.258	15.0851	15.4325	14.4435	16.2988	14.244	17.9377
32	15.2304	15.0577	15.4051	14.3123	16.267	14.0919	17.8902
33	15.2431	15.0653	15.4228	14.2822	16.2403	14.0559	17.8501
34	16.2086	16.022	16.3967	15.2976	17.1997	15.2225	19.2568
35	15.5689	15.3875	15.7539	14.8527	16.4001	14.7114	18.0892
36	15.1333	14.9559	15.3161	14.4133	15.965	14.209	17.4436
37	15.7611	15.5769	15.952	15.2751	16.2936	15.1968	17.9298
38	15.7336	15.5485	15.9246	15.0099	16.5456	14.8905	18.3004
39	14.3884	14.2209	14.5614	13.9794	14.8487	13.6975	15.8029
40	13.5479	13.3984	13.7011	12.7352	14.2467	11.9249	14.9176
41	14.8328	14.6591	15.0124	14.1098	15.5881	13.8548	16.8898
42	14.0241	13.8452	14.2086	13.3433	14.7152	12.8162	15.6065
43	15.4102	15.2182	15.6078	14.2872	16.4762	14.0621	18.2001
44	14.9976	14.8182	15.1829	14.1596	15.7568	13.9137	17.1347
45	15.1961	15.0149	15.3809	14.455	15.9219	14.2575	17.3785
46	15.7492	15.612	15.8834	14.8606	16.6454	14.7203	18.4447
47	15.1636	15.0348	15.2899	14.5745	15.7343	14.3957	17.1017
48	14.2555	14.1156	14.3936	13.4036	15.0954	12.903	16.1648
49	15.2576	15.1043	15.4069	14.6395	15.8215	14.4683	17.229
50	14.8014	14.6626	14.9357	14.109	15.4872	13.854	16.7384
51	14.7989	14.6649	14.9289	14.1225	15.4154	13.8694	16.6302
52	14.7575	14.6276	14.8811	14.1269	15.3481	13.8741	16.5309
53	14.537	14.4117	14.6567	13.8992	15.1836	13.5974	16.2937
54	14.391	14.2691	14.5073	13.7787	15.001	13.4375	16.0277
55	14.2814	14.1616	14.3948	13.7333	14.8374	13.3758	15.7865
56	14.7978	14.6738	14.9151	14.2923	15.3166	14.0683	16.4853
57	14.4113	14.2915	14.5248	14.0066	14.8257	13.7307	15.7695
58	14.4072	14.2886	14.5199	13.9301	14.859	13.6355	15.8178
59	13.4912	13.382	13.5952	13.0002	13.9745	12.3144	14.5216
60	14.2816	14.1641	14.3933	13.8129	14.7443	13.4852	15.65
61	13.9273	13.8134	14.0351	13.4529	14.3541	12.9723	15.074
62	13.3068	13.1993	13.4091	12.7198	13.8652	11.9022	14.3575
63	14.1904	14.0737	14.3006	13.858	14.5071	13.5442	15.2978
64	14.2161	14.0986	14.3263	13.6234	14.8097	13.2211	15.7463
65	14.3845	14.2664	14.4957	13.6053	15.0758	13.1952	16.1369
66	14.5731	14.4536	14.6853	13.9869	15.1008	13.7061	16.1729
67	14.1531	14.0378	14.2622	13.43	14.8141	12.9404	15.7527
68	13.7145	13.6034	13.8194	13.0939	14.3072	12.4505	15.0071
69	14.7585	14.6365	14.8741	14.1536	15.3457	13.9071	16.5273
70	14.692	14.5706	14.8071	13.9312	15.3732	13.6367	16.5677
71	14.0082	13.894	14.1167	13.3841	14.6015	12.8745	15.4344
72	14.3414	14.2252	14.4526	13.5856	14.9958	13.166	16.0198
73	14.6225	14.5037	14.7366	13.9867	15.2211	13.7058	16.3471
74	13.6093	13.5008	13.7136	12.5591	14.5855	11.6654	15.4103
75	14.417	14.3012	14.5293	13.6743	15.0931	13.2931	16.1615
76	14.1234	14.0105	14.2335	13.439	14.739	12.9537	15.6421
77	14.9521	14.8305	15.0703	14.2042	15.6552	13.9663	16.987
78	14.4282	14.3118	14.5414	13.8181	14.9986	13.492	16.0241
79	15.3841	15.259	15.5063	14.3335	16.3511	14.1166	18.016
80	13.1779	13.0736	13.2801	12.6895	13.6489	11.8587	14.0473
81	14.6505	14.5311	14.7674	13.968	15.3237	13.6834	16.4956
82	13.1338	13.0284	13.2371	12.758	13.5355	11.9583	13.8893
83	13.7032	13.5924	13.8125	12.9717	14.359	12.2727	15.0809
84	13.0618	12.9575	13.1652	12.5725	13.5128	11.6854	13.8571
85	12.0738	11.9798	12.1673	11.5839	12.5223	10.2359	12.6676
86	13.242	13.1348	13.3486	12.793	13.6857	12.0089	14.0977
87	12.8708	12.7677	12.9735	12.5002	13.2197	11.5788	13.4767
88	15.3059	15.1773	15.4342	14.6549	15.9316	14.486	17.393
89	13.3227	13.2129	13.4316	12.7222	13.9529	11.9058	14.4889
90	13.3363	13.2259	13.4452	12.9251	13.7555	12.2044	14.1999
91	14.1433	14.0254	14.2594	13.7163	14.5607	13.3525	15.3746
92	14.3256	14.2041	14.4446	13.6386	14.999	13.2435	16.0246
93	14.4383	14.3155	14.5583	14.0404	14.8142	13.7706	15.7529
94	14.6846	14.558	14.8078	14.2346	15.1935	14.0019	16.3079
95	14.1516	14.0299	14.2694	13.3624	14.9972	12.8426	16.022
96	13.9869	13.8678	14.1023	13.5095	14.4973	13.0561	15.2832
97	13.5937	13.4773	13.706	13.0225	14.2014	12.3471	14.8505
98	15.045	14.912	15.173	14.2671	15.9028	14.038	17.3496
99	15.7555	15.6167	15.8896	15.167	16.3335	15.0701	17.9896
100	14.9159	14.7847	15.0421	14.4788	15.4211	14.2844	16.6386
101	12.5649	12.4392	12.6877	12.1589	12.9596	11.0783	13.1675
102	13.6228	13.4896	13.7521	12.9065	14.313	12.1767	15.0159
103	13.5293	13.3991	13.6552	12.9442	14.1372	12.2329	14.7578
104	12.7999	12.6829	12.913	12.4246	13.1689	11.4679	13.4147
105	13.7898	13.663	13.9109	12.8499	14.6901	12.0932	15.5685
106	13.7383	13.6141	13.8567	12.7883	14.6867	12.0024	15.5634
107	14.1646	14.0339	14.2884	13.4295	14.873	12.9397	15.8381
108	14.421	14.2877	14.5462	13.8415	15.0588	13.5225	16.1127
109	14.4604	14.3287	14.584	13.6828	15.1897	13.3047	16.3025
110	13.4641	13.3417	13.5792	13.1331	13.8404	12.5081	14.3216
111	14.3504	14.2189	14.4743	13.786	14.8989	13.4473	15.8769
112	15.0925	14.9523	15.2241	14.491	15.6705	14.2987	17.0094
113	14.7708	14.6332	14.8997	14.1904	15.3633	13.9488	16.5529
114	14.2966	14.1655	14.4199	13.6619	14.9079	13.2755	15.8906
115	14.3986	14.2656	14.5236	13.9207	14.8539	13.6229	15.8104
116	14.753	14.6144	14.8836	14.3424	15.2207	14.1269	16.3465
117	14.3659	14.2325	14.4918	13.7386	14.9261	13.3824	15.9176
118	15.4474	15.3003	15.5868	14.8311	16.0956	14.6862	17.6353
119	14.0866	13.9543	14.2126	13.5426	14.6989	13.1034	15.5818
120	13.5367	13.4108	13.6568	13.0654	14.0101	12.409	14.5743
121	13.8686	13.7377	13.9943	13.3659	14.4368	12.8471	15.1943
122	14.4351	14.2983	14.5667	13.9058	14.9546	13.6047	15.9579
123	14.473	14.3338	14.6062	14.1567	14.8065	13.9104	15.7416
124	14.1336	13.9991	14.2616	13.7776	14.49	13.4359	15.2725
125	14.0301	13.8957	14.157	13.66	14.4448	13.2726	15.2054
126	14.4994	14.36	14.6307	13.9102	15.0267	13.6104	16.0663
127	14.3966	14.2564	14.5275	13.8423	14.9597	13.5238	15.9655
128	13.5394	13.4061	13.6643	12.8123	14.284	12.0378	14.9717
129	13.7937	13.6586	13.9207	13.2378	14.3437	12.6617	15.0595
130	13.1367	13.0101	13.2568	12.6347	13.6333	11.7776	14.0263
131	14.3895	14.2483	14.5246	13.9051	14.8545	13.6039	15.8113
132	15.2557	15.1022	15.4024	14.7282	15.7776	14.5688	17.1653
133	13.9024	13.7648	14.0345	13.3442	14.4475	12.8177	15.2095
134	14.144	14.0015	14.2806	13.5192	14.7773	13.0697	15.699
135	14.3395	14.1969	14.4767	13.7193	14.9318	13.3565	15.9254
136	14.5168	14.3699	14.6582	13.9121	15.0731	13.6132	16.1331
137	14.984	14.8321	15.1309	14.3837	15.5739	14.1743	16.8688
138	14.5317	14.3824	14.6758	13.9313	15.1222	13.6369	16.205
139	14.9249	14.7726	15.0722	14.1915	15.5883	13.9502	16.8901
140	14.8527	14.6996	15.0005	14.1183	15.575	13.8646	16.8705
141	14.223	14.0769	14.3643	13.7023	14.7395	13.3323	15.6428
142	14.0035	13.8591	14.1434	13.4623	14.54	12.9875	15.3452
143	13.9959	13.8511	14.1367	13.5678	14.4321	13.1401	15.1872
144	12.551	12.4246	12.6746	12.1726	12.9352	11.0981	13.1395
145	13.5864	13.4486	13.7214	12.9283	14.2363	12.2095	14.9025
146	13.6627	13.5219	13.8003	13.2029	14.102	12.6096	14.7053
147	13.801	13.6575	13.9408	13.013	14.6053	12.3332	15.4402
148	13.8097	13.6658	13.9495	13.141	14.4683	12.5195	15.2403
149	14.4358	14.2827	14.5839	13.6277	15.2292	13.2274	16.3587
150	13.268	13.1289	13.402	12.6665	13.9202	11.8243	14.4408
151	13.3107	13.1723	13.4437	12.6805	13.9612	11.8455	14.5017
152	12.6668	12.5328	12.7955	11.8977	13.474	10.6972	13.8048
153	12.9301	12.7919	13.0616	12.1454	13.707	11.0593	14.1284
154	14.1661	14.0122	14.3119	13.4587	14.9616	12.9816	15.9684
155	14.2162	14.0599	14.3644	13.5138	14.8997	13.0621	15.878
156	13.5589	13.4099	13.7002	12.7444	14.4245	11.9384	15.1752
157	13.3222	13.1761	13.4604	12.6867	13.9326	11.8547	14.4593
158	13.5762	13.4264	13.7177	12.8454	14.2733	12.0867	14.9562
159	13.5862	13.436	13.7272	12.9173	14.2054	12.1926	14.8562
160	13.5446	13.3941	13.6855	12.7868	14.3151	12.0004	15.0191
161	14.0377	13.892	14.1714	13.341	14.6956	12.8132	15.577
162	14.5808	14.4277	14.7211	13.8826	15.2423	13.5758	16.3773
163	12.887	12.755	13.0078	12.3359	13.4139	11.3377	13.7229
164	13.4266	13.2861	13.5555	12.8448	13.9493	12.0857	14.4835
165	13.8262	13.6797	13.9607	13.1956	14.3328	12.5992	15.0443
166	13.3322	13.1918	13.4613	12.6295	13.9234	11.7702	14.4457
167	14.1586	14.0065	14.2982	13.4656	14.7883	12.9926	15.7152
168	13.6993	13.554	13.8333	12.9247	14.444	12.2039	15.2042
169	13.9069	13.7582	14.0446	13.2489	14.6114	12.678	15.4495
170	14.3271	14.1712	14.4716	13.6625	14.9931	13.2763	16.0158
171	13.8886	13.7273	14.0391	13.1951	14.5928	12.5984	15.4214
172	13.5979	13.4532	13.733	13.0733	14.1198	12.4197	14.7326
173	13.8868	13.7414	14.0233	13.4964	14.2646	13.037	14.9436
174	13.6718	13.5293	13.8058	13.3202	14.0773	12.783	14.6703
175	13.1783	13.0432	13.3062	12.842	13.5524	12.0817	13.9147
176	14.6759	14.5234	14.8212	14.1757	15.176	13.932	16.2827
177	13.7	13.5612	13.8333	13.1061	14.3473	12.4685	15.0646
178	13.7807	13.6411	13.9143	13.2797	14.29	12.7234	14.9808
179	13.6648	13.5273	13.797	12.9405	14.3951	12.2278	15.1327
180	14.3578	14.2092	14.5002	13.8099	14.9188	13.4809	15.9071
181	14.0689	13.9257	14.2059	13.1906	14.9522	12.5919	15.9543
182	14.6945	14.5386	14.8432	14.1604	15.242	13.9145	16.3769
183	13.6397	13.4958	13.7764	13.1811	14.1318	12.5783	14.7496
184	13.8597	13.7162	13.9961	12.9639	14.743	12.2615	15.6481
185	14.6112	14.4528	14.7609	13.9591	15.2849	13.6718	16.4383
186	14.6746	14.5187	14.8221	14.0636	15.285	13.7984	16.4384
187	14.2061	14.0533	14.3504	13.6463	14.7785	13.254	15.7008
188	14.4047	14.2486	14.5533	13.9252	14.9062	13.629	15.8879
189	13.8632	13.7132	14.008	13.4538	14.2943	12.9737	14.9874
190	15.6219	15.447	15.7911	15	16.2081	14.8789	17.8019
191	14.579	14.4182	14.7361	14.0119	15.1853	13.737	16.296
192	14.4701	14.3087	14.6281	13.8623	15.1303	13.5495	16.2169
193	13.4683	13.3221	13.6128	12.9237	14.0516	12.2022	14.6345
194	13.8004	13.6482	13.9509	13.4373	14.1786	12.9511	14.8176
195	12.3843	12.2519	12.5166	11.8607	12.9434	10.6435	13.1488
196	13.6323	13.4819	13.7822	13.1035	14.1885	12.4646	14.8317
197	12.7375	12.599	12.8769	12.1993	13.3242	11.1374	13.6085
198	13.2912	13.1461	13.4378	12.6428	14.0054	11.7894	14.5674
199	12.7241	12.5848	12.8646	12.0379	13.4901	10.9018	13.827
200	13.6312	13.4792	13.7835	13.0041	14.2737	12.3208	14.9567
201	12.6747	12.5343	12.8156	12.1876	13.1833	11.1202	13.4322
202	13.3274	13.1792	13.4762	12.8831	13.8254	12.1421	14.3
203	13.6448	13.4928	13.7974	13.1002	14.1837	12.4598	14.8249
204	13.703	13.5492	13.8573	13.2504	14.1905	12.6802	14.8346
205	13.6118	13.4621	13.7624	12.7481	14.5563	11.9437	15.3684
206	13.9792	13.8207	14.1378	13.553	14.4696	13.1197	15.2423
207	13.8017	13.644	13.959	13.3631	14.2629	12.8435	14.941
208	12.7316	12.5892	12.8744	12.2878	13.214	11.267	13.4694
209	14.007	13.8476	14.1668	13.3714	14.6732	12.8552	15.543
210	15.2158	15.0351	15.3984	14.7404	15.7162	14.5824	17.0755
211	13.6038	13.4468	13.7627	13.0139	14.2345	12.3344	14.8998
212	14.2908	14.125	14.4572	13.7263	14.8682	13.3665	15.8311
213	13.6501	13.4911	13.8093	13.0096	14.3274	12.3286	15.0368
214	14.0569	13.8937	14.2211	13.2471	14.9425	12.6753	15.9404
215	13.9594	13.7929	14.1279	13.3604	14.5934	12.84	15.4222
216	14.1184	13.9471	14.2929	13.4599	14.8152	12.9836	15.7543
217	14.5421	14.3649	14.7222	13.9605	15.162	13.6739	16.2626
218	12.7171	12.5673	12.8693	12.1002	13.3929	10.9932	13.6957
219	14.4765	14.2953	14.6623	13.8314	15.1212	13.5084	16.2035
220	13.5166	13.3471	13.6923	12.8774	14.2005	12.134	14.8493
221	11.7466	11.6028	11.8967	11.018	12.464	9.40579	12.6017
222	13.5341	13.3638	13.7123	12.7376	14.3685	11.9286	15.0941
223	14.3147	14.1289	14.5105	13.3079	15.4994	12.7655	16.7568
224	14.4599	14.2696	14.6598	13.4617	15.4862	12.9864	16.7368
225	14.1658	13.9807	14.3618	13.2054	15.2537	12.6132	16.3935
226	13.913	13.7279	14.1087	13.1138	14.7752	12.4796	15.6959
227	12.8835	12.7115	13.066	12.0241	13.8658	10.8816	14.3583
228	13.6038	13.4197	13.7975	12.6328	14.6948	11.7749	15.5757
229	15.5683	15.3573	15.7889	14.7289	16.4375	14.5696	18.1441
230	13.0922	12.92	13.2741	12.4	13.8747	11.4317	14.3712
231	13.9584	13.7749	14.1516	13.187	14.7336	12.5869	15.6341
232	14.8985	14.6997	15.1079	14.1626	15.6696	13.9166	17.0081
233	13.7781	13.5946	13.973	12.9362	14.7551	12.2217	15.6661
234	13.9423	13.7571	14.1387	12.8386	15.0309	12.0766	16.0726
235	14.5898	14.3909	14.8003	13.6457	15.6025	13.2532	16.9108
236	12.7412	12.5683	12.9256	11.8193	13.7872	10.5817	14.246
237	14.4216	14.2274	14.6278	13.8038	15.1143	13.4729	16.1932
238	14.7225	14.5198	14.9381	13.8433	15.674	13.5254	17.0144
239	14.5634	14.363	14.7779	13.5056	15.7729	13.0505	17.1584
240	13.4812	13.2955	13.6803	12.5305	14.5521	11.6233	15.3624
241	15.3526	15.1374	15.5808	14.69	16.0436	14.5265	17.5584
242	14.3256	14.1232	14.5405	13.6615	15.1208	13.2748	16.2029
243	14.4083	14.2019	14.627	13.6181	15.2274	13.2127	16.3561
244	15.0655	14.8484	15.2955	14.3211	15.8459	14.1028	17.2645
245	14.9235	14.71	15.1496	14.1512	15.7632	13.9043	17.1442
246	13.7451	13.544	13.9581	12.8136	14.7403	12.0398	15.6441
247	13.7019	13.5001	13.9156	12.7043	14.7887	11.8797	15.7158
248	13.5368	13.3374	13.7472	12.6708	14.539	11.8308	15.3438
249	12.9468	12.7557	13.1477	12.2679	13.7559	11.2377	14.2005
250	13.8535	13.6486	14.069	12.7873	14.9483	12.001	15.9484
251	13.0802	12.8837	13.287	12.2655	14.0285	11.2343	14.6008
252	15.2252	14.9964	15.4644	14.1705	16.3406	13.9256	18.0003
253	13.5988	13.3906	13.8162	12.8944	14.384	12.1591	15.1166
254	13.6934	13.4868	13.9089	12.64	14.866	11.7853	15.8279
255	15.0127	14.7805	15.2544	14.046	16.0609	13.7775	17.5843
256	14.951	14.7238	15.1856	14.0024	15.956	13.7257	17.43
257	14.5188	14.2972	14.7464	13.5756	15.6057	13.1514	16.9153
258	13.644	13.4348	13.8593	12.8473	14.4589	12.0893	15.2264
259	14.7451	14.5153	14.9808	14.1413	15.3792	13.8917	16.5767
260	12.513	12.3097	12.725	11.8434	13.2307	10.6177	13.4901
261	13.4985	13.2817	13.7259	12.7715	14.2658	11.9781	14.9452
262	14.2821	14.0497	14.5255	13.7641	14.8767	13.4181	15.8434
263	13.2018	12.9957	13.4177	12.3555	13.9944	11.3661	14.5509
264	13.4787	13.2618	13.7067	12.9075	14.09	12.1781	14.688
265	12.3632	12.1715	12.5645	11.713	13.0365	10.4264	13.2594
266	14.889	14.7133	15.0585	14.098	15.6759	13.8402	17.0172
267	12.9729	12.824	13.116	12.4645	13.4876	11.526	13.8233
268	13.704	13.5428	13.8597	13.0877	14.3375	12.4415	15.0509
269	14.2731	14.1002	14.4402	13.9359	14.6466	13.6426	15.5028
270	13.1211	12.9702	13.2668	12.4511	13.9106	11.5062	14.426
271	13.2486	13.0956	13.3955	12.7923	13.7404	12.008	14.1772
272	14.743	14.5655	14.9131	13.9124	15.5359	13.6136	16.8118
273	13.8262	13.6658	13.9799	13.0382	14.6505	12.3703	15.5087
274	13.5423	13.3829	13.6956	12.855	14.2359	12.1009	14.9019
275	13.9712	13.8055	14.1311	13.4898	14.4502	13.0269	15.2135
276	14.6332	14.4573	14.8038	14.2621	15.0146	14.0326	16.0482
277	14.3611	14.2048	14.512	13.7033	15.0167	13.3339	16.0514
278	14.8412	14.6809	14.9974	14.1923	15.5009	13.9512	16.7591
279	14.5468	14.3906	14.6991	13.8358	15.2298	13.5145	16.3595
280	13.9641	13.8138	14.111	13.3568	14.5909	12.8355	15.4184
281	14.4309	14.275	14.5836	13.7931	15.1044	13.4574	16.1783
282	13.3384	13.2116	13.4592	12.6305	13.9757	11.7716	14.5231
283	14.1895	14.0529	14.3198	13.2437	15.1254	12.6704	16.2098
284	14.5829	14.4362	14.7243	13.7793	15.3874	13.4382	16.5891
285	14.1459	13.9961	14.2925	13.4045	14.8937	12.9043	15.8689
286	13.8629	13.7107	14.0115	13.0835	14.6428	12.4349	15.497
287	13.8037	13.6588	13.9451	13.318	14.3232	12.7799	15.031
288	13.8239	13.6844	13.96	13.3197	14.3286	12.7822	15.0385
289	13.4809	13.3478	13.6091	12.9143	14.0199	12.1878	14.5883
290	13.0263	12.9019	13.1449	12.8532	13.2074	12.0982	13.461
291	14.124	13.9912	14.251	13.698	14.5584	13.3263	15.3714
292	13.4208	13.2984	13.5375	12.9783	13.8637	12.283	14.3554
293	13.2267	13.1082	13.3391	12.8216	13.6561	12.0514	14.0571
294	14.5299	14.3987	14.6546	14.1468	14.9081	13.8987	15.8909
295	14.0075	13.8821	14.1269	13.5963	14.4325	13.1815	15.1878
296	13.8978	13.7739	14.0154	13.3674	14.4493	12.8492	15.2121
297	15.2486	15.1098	15.3798	14.8325	15.6963	14.688	17.0466
298	14.6761	14.543	14.8015	14.0464	15.2986	13.7779	16.4589
299	12.4656	12.3571	12.5676	12.0828	12.8918	10.9678	13.0896
300	12.7395	12.6292	12.8439	12.5031	13.0007	11.5831	13.2161
301	11.5719	11.4608	11.6785	11.1331	12.0666	9.57327	12.1476
302	13.2885	13.1624	13.4098	12.8337	13.7523	12.0693	14.1957
303	13.0694	12.9426	13.1906	12.663	13.4978	11.819	13.8368
304	13.4333	13.3069	13.5546	13.0555	13.8005	12.3947	14.2648
305	12.5257	12.4134	12.6332	12.2809	12.7823	11.2569	12.964
306	13.469	13.3487	13.5841	13.1891	13.7483	12.5899	14.1895
307	13.2129	13.0972	13.3233	12.8653	13.5425	12.1164	13.8995
308	13.0578	12.9447	13.1652	12.685	13.4241	11.8523	13.7366
309	13.015	12.9039	13.1209	12.6225	13.4155	11.76	13.7255
310	12.955	12.8462	13.0595	12.6836	13.2116	11.8502	13.466
311	12.4145	12.3116	12.5133	12.1197	12.7058	11.0218	12.8757
312	12.8995	12.7912	13.0038	12.5583	13.2184	11.6642	13.4753
313	13.5764	13.4601	13.689	13.1751	13.9967	12.5697	14.5545
314	12.1479	12.048	12.2453	11.8257	12.4662	10.5912	12.6042
315	12.1603	12.0602	12.2586	11.7082	12.5856	10.4193	12.7382
316	12.9864	12.8782	13.0931	12.6632	13.3205	11.8192	13.6036
317	13.0611	12.9513	13.1696	12.7685	13.378	11.9736	13.6764
318	13.8266	13.7083	13.9434	13.445	14.2172	12.9617	14.8736
319	13.7942	13.6768	13.9105	13.4022	14.192	12.9008	14.8368
320	14.1628	14.041	14.2839	13.8045	14.5574	13.4741	15.3699
321	14.4072	14.2834	14.5302	14.0609	14.7606	13.7954	15.6743
322	13.0684	12.9585	13.1777	12.7429	13.4114	11.9363	13.7197
323	14.0683	13.9483	14.1871	13.6464	14.5022	13.2542	15.2905
324	13.9491	13.8294	14.068	13.4746	14.4592	13.0054	15.2268
325	12.5052	12.4008	12.6092	12.067	12.985	10.9446	13.1975
326	13.4653	13.352	13.5787	13.0723	13.8844	12.4184	14.3855
327	13.5217	13.4073	13.6364	13.078	13.9959	12.4265	14.5533
328	13.5268	13.4123	13.6419	13.1478	13.9344	12.529	14.4618
329	12.8802	12.7724	12.9882	12.4637	13.3269	11.5248	13.6119
330	14.1727	14.05	14.2961	13.682	14.7265	13.3036	15.6236
331	13.5914	13.4756	13.7074	13.0738	14.1361	12.4205	14.756
332	12.5624	12.4565	12.6675	12.1109	13.022	11.009	13.2419
333	13.6316	13.5132	13.7488	13.1313	14.1894	12.5054	14.8331
334	14.4187	14.2934	14.5435	14.0159	14.829	13.7417	15.7743
335	12.6706	12.5631	12.7773	12.1934	13.1865	11.1288	13.4361
336	12.5252	12.4187	12.6309	12.0077	13.0688	10.8577	13.2979
337	14.2838	14.1584	14.4078	13.6612	14.9386	13.2744	15.9349
338	14.1608	14.0367	14.2834	13.7123	14.6376	13.3467	15.4891
339	11.2887	11.1933	11.3827	10.7378	11.916	8.99454	11.9799
340	12.6372	12.5276	12.7453	12.2545	13.0496	11.2182	13.2751
341	13.3096	13.1928	13.425	13.015	13.6067	12.3359	13.9894
342	12.9574	12.8443	13.0693	12.6032	13.304	11.7319	13.5818
343	12.2598	12.1541	12.3643	11.8959	12.6154	10.6948	12.7727
344	14.2428	14.1144	14.3696	13.7534	14.7197	13.4027	15.6133
345	12.2397	12.1319	12.3456	11.8353	12.6343	10.6057	12.7942
346	13.9759	13.8475	14.1012	13.4361	14.5371	12.9494	15.341
347	13.6607	13.5362	13.7825	13.2007	14.1418	12.6065	14.7646
348	14.2852	14.1534	14.4144	13.8533	14.7209	13.5378	15.6151
349	14.2572	14.1242	14.3879	13.8802	14.7041	13.5732	15.5897
350	13.7891	13.6629	13.9135	13.3024	14.2573	12.7578	14.933
351	14.4943	14.3597	14.6275	14.0293	14.9542	13.7577	15.9572
352	13.3966	13.2747	13.517	12.8812	13.8817	12.1394	14.3815
353	13.3768	13.2523	13.4997	12.988	13.807	12.2967	14.2739
354	12.7782	12.659	12.8956	12.3135	13.277	11.3047	13.5485
355	12.5898	12.4739	12.7042	12.1356	13.0646	11.0445	13.2929
356	12.6215	12.5049	12.7362	12.1225	13.1004	11.0258	13.3344
357	12.5765	12.4596	12.6913	12.1532	13.0054	11.0703	13.222
358	13.443	13.3151	13.5682	12.9845	13.922	12.2917	14.4435
359	13.432	13.3047	13.5562	12.9917	13.8645	12.3019	14.3565
360	12.801	12.6703	12.9292	12.2644	13.3604	11.2327	13.6539
361	13.9822	13.839	14.123	13.4274	14.5434	12.9368	15.3501
362	14.146	14.0021	14.286	13.5733	14.7094	13.1483	15.5978
363	14.967	14.8134	15.1162	14.4305	15.5234	14.2282	16.793
364	14.8758	14.7256	15.0222	14.4268	15.3186	14.2243	16.4883
365	14.4117	14.2665	14.5523	14.0029	14.8312	13.7262	15.7775
366	13.9712	13.8295	14.1081	13.4209	14.4988	12.9278	15.2854
367	14.0498	13.9071	14.1873	13.526	14.5857	13.0798	15.4106
368	14.66	14.5089	14.8062	14.1616	15.1493	13.9157	16.2443
369	14.935	14.7795	15.0854	14.3967	15.4999	14.1896	16.7575
370	14.8881	14.733	15.0381	14.3587	15.404	14.1457	16.6136
371	14.945	14.7879	15.0971	14.4401	15.4403	14.2398	16.6676
372	13.3722	13.2308	13.5097	12.8812	13.8535	12.1393	14.341
373	14.9769	14.8163	15.1331	14.4513	15.5122	14.253	16.7761
374	14.988	14.8296	15.1421	14.4032	15.5552	14.1974	16.8406
375	14.9335	14.7764	15.0859	14.2653	15.5513	14.036	16.8349
376	15.1717	15.0105	15.3284	14.5683	15.7547	14.3878	17.1316
377	14.6014	14.4465	14.7524	14.0517	15.136	13.7839	16.2251
378	14.9386	14.7786	15.0941	14.3919	15.4939	14.1841	16.7485
379	13.5657	13.4238	13.7038	13.0214	14.0729	12.3453	14.6642
380	14.4225	14.2702	14.5707	13.7234	15.0518	13.3622	16.1029
381	13.3642	13.2281	13.4964	12.8565	13.8379	12.103	14.3179
382	14.13	13.9822	14.2735	13.6052	14.6721	13.195	15.5414
383	13.5816	13.4409	13.7176	13.0788	14.1058	12.4276	14.7111
384	15.3826	15.2166	15.5431	14.8328	15.9473	14.6883	17.4168
385	15.2325	15.0682	15.3919	14.6055	15.8932	14.4308	17.3351
386	15.2325	15.0687	15.3915	14.6775	15.8354	14.5128	17.2492
387	14.0485	13.8999	14.1928	13.5561	14.5715	13.124	15.3898
388	14.655	14.4982	14.8075	14.1853	15.1376	13.9434	16.2274
389	14.6128	14.457	14.7645	14.2009	15.0317	13.9622	16.0739
390	13.9055	13.7567	14.0505	13.4801	14.3372	13.0131	15.0505
391	13.1012	12.9647	13.2338	12.6201	13.5496	11.7564	13.9105
392	12.5928	12.4601	12.7219	12.0835	13.1137	10.9688	13.3498
393	13.2959	13.1571	13.4302	12.8726	13.7007	12.1272	14.1186
394	13.4852	13.3432	13.6228	12.9808	13.9416	12.2865	14.4725
395	13.4928	13.3515	13.6296	12.9891	13.9737	12.2982	14.5205
396	12.3763	12.248	12.5003	11.9057	12.8387	10.7089	13.029
397	13.6303	13.4849	13.7705	13.0717	14.1803	12.4175	14.8201
398	13.9121	13.7635	14.0558	13.4085	14.4052	12.9103	15.1472
399	14.6552	14.4955	14.8098	14.1564	15.1595	13.91	16.2589
400	13.2372	13.0957	13.3738	12.7111	13.7592	11.8895	14.2052
401	15.4029	15.2307	15.5695	14.7829	16.0542	14.6316	17.5742
402	14.4222	14.263	14.5769	13.8786	14.9684	13.5708	15.9786
403	14.4455	14.2863	14.6001	13.8289	15.0256	13.5054	16.0647
404	13.6681	13.5173	13.8145	13.1025	14.2204	12.4632	14.8783
405	13.8306	13.6782	13.9785	13.3987	14.2684	12.8955	14.949
406	15.7751	15.5955	15.9499	15.2724	16.2978	15.1938	17.9362
407	15.0918	14.9199	15.2591	14.5769	15.6609	14.3985	16.9953
408	15.268	15.092	15.4388	14.6423	15.9338	14.4713	17.3964
409	15.1427	14.9657	15.3143	14.4692	15.9025	14.2729	17.3492
410	15.3289	15.1515	15.5012	14.6727	15.9938	14.5072	17.486
411	14.3368	14.1708	14.4983	13.6432	15.0993	13.2497	16.1706
412	13.4617	13.3068	13.6116	12.8301	14.1634	12.0637	14.7957
413	12.9866	12.8397	13.1289	12.4398	13.5689	11.4902	13.9374
414	11.937	11.8038	12.0659	11.4175	12.4719	9.99125	12.6106
415	13.4152	13.2615	13.5639	12.8266	14.0171	12.0584	14.5843
416	12.5511	12.4069	12.6908	12.0547	13.1045	10.9266	13.339
417	11.7857	11.653	11.9141	11.2544	12.3775	9.75036	12.5026
418	12.4514	12.308	12.5907	11.8165	13.1002	10.5773	13.3341
419	13.1124	12.9606	13.2599	12.4155	13.7729	11.4545	14.2253
420	13.0611	12.9073	13.2107	12.4388	13.7202	11.4887	14.148
421	12.2726	12.1301	12.4113	11.7698	12.8187	10.5093	13.0067
422	12.8043	12.6546	12.9497	12.2269	13.3959	11.1777	13.7
423	13.7199	13.557	13.8772	13.1768	14.3106	12.5722	15.0123
424	14.2599	14.0861	14.428	13.5276	14.9819	13.0822	15.9991
425	14.0898	13.9186	14.2551	13.4572	14.7243	12.9793	15.6203
426	13.1802	13.0209	13.3346	12.5819	13.8061	11.6997	14.2728
427	14.9657	14.7788	15.1474	14.3881	15.5926	14.1797	16.8964
428	14.6754	14.4928	14.8536	14.0909	15.369	13.8318	16.5615
429	14.36	14.1821	14.5332	13.806	14.9829	13.476	16.0004
430	15.5007	15.3062	15.6906	15.0296	16.0559	14.9135	17.5768
431	14.3673	14.1875	14.5426	13.8031	14.9978	13.4718	16.0229
432	14.1349	13.9581	14.3079	13.6434	14.677	13.25	15.5488
433	13.472	13.3021	13.6388	12.8444	14.1517	12.0852	14.7789
434	14.8678	14.6821	15.05	14.1779	15.5434	13.9342	16.823
435	14.7058	14.5175	14.8905	14.1009	15.354	13.8437	16.5393
436	13.0542	12.8931	13.2122	12.5321	13.5837	11.6257	13.9574
437	13.1998	13.0509	13.3448	12.6703	13.7155	11.83	14.1408
438	13.3688	13.2139	13.5196	12.879	13.8732	12.1362	14.3688
439	12.7755	12.6298	12.9183	12.1509	13.3818	11.067	13.6812
440	13.8461	13.6827	14.0061	13.2868	14.3936	12.7341	15.1306
441	14.3006	14.133	14.4652	13.6784	14.9357	13.2985	15.9309
442	14.1759	14.0122	14.3366	13.4413	14.8392	12.9569	15.7891
443	14.1791	14.0155	14.3397	13.4994	14.8055	13.0414	15.7401
444	14.6404	14.4697	14.8093	14.0754	15.1829	13.8127	16.2927
445	13.81	13.6514	13.9679	13.1221	14.4424	12.4915	15.202
446	13.2499	13.0956	13.4036	12.616	13.8737	11.7504	14.3695
447	12.4082	12.2651	12.5504	11.8782	12.9426	10.6691	13.1479
448	13.7875	13.628	13.9458	13.2842	14.2875	12.7301	14.977
449	13.8856	13.7271	14.0424	13.2659	14.4752	12.7027	15.2505
450	13.9423	13.7835	14.0988	13.2342	14.6053	12.6565	15.4403
451	14.6395	14.4677	14.8094	14.045	15.1962	13.7762	16.3116
452	14.6644	14.4921	14.8347	14.149	15.1863	13.9014	16.2976
453	13.7502	13.588	13.9106	13.3435	14.1525	12.8166	14.78
454	13.1304	12.982	13.2774	12.5572	13.673	11.6626	14.0795
455	13.3801	13.2256	13.5338	12.8353	13.9226	12.0717	14.4444
456	13.5429	13.388	13.6964	12.9423	14.094	12.2303	14.6937
457	14.2261	14.063	14.3885	13.5375	14.8633	13.0957	15.824
458	13.7128	13.5506	13.8744	13.134	14.2297	12.5094	14.8922
459	11.6883	11.5535	11.8234	11.2086	12.1692	9.68258	12.2666
460	13.2676	13.1083	13.427	12.5691	13.9143	11.6802	14.4317
461	13.3702	13.2123	13.5288	12.9054	13.8129	12.1751	14.2824
462	12.4654	12.32	12.612	11.9385	12.9635	10.7566	13.1721
463	14.0806	13.9094	14.2527	13.4101	14.7201	12.9127	15.6139
464	12.6707	12.5219	12.8205	12.1085	13.2157	11.0055	13.4717
465	13.2832	13.1263	13.4413	12.6824	13.8993	11.8483	14.4084
466	13.7387	13.5772	13.9011	13.0999	14.3575	12.4593	15.0788
467	12.6938	12.5421	12.8473	12.1134	13.3533	11.0126	13.6446
468	13.3802	13.2195	13.5422	12.7454	14.0406	11.9399	14.6182
469	13.6702	13.5045	13.8373	13.0515	14.3276	12.389	15.0371
470	13.5937	13.4288	13.7602	12.9757	14.2018	12.2791	14.8511
471	12.0919	11.9486	12.2369	11.6503	12.5279	10.3334	12.6739
472	13.7004	13.5299	13.8739	13.16	14.2467	12.5462	14.9175
473	14.3408	14.1646	14.5192	13.7558	14.8705	13.4065	15.8345
474	12.1787	12.0343	12.3262	11.7679	12.5949	10.5066	12.7486
475	13.2077	13.0474	13.3719	12.6526	13.8047	11.8038	14.2707
476	13.5417	13.3731	13.7145	12.9936	14.0991	12.3046	14.7011
477	12.6848	12.5305	12.8415	11.9932	13.3149	10.8371	13.596
478	12.85	12.6914	13.0123	12.364	13.3164	11.3786	13.5982
479	12.8301	12.6739	12.9904	12.3198	13.3441	11.314	13.6333
480	13.3068	13.1449	13.4735	12.6351	13.994	11.7783	14.5503
481	13.3309	13.1612	13.5076	12.9467	13.7033	12.2361	14.1226
482	14.3775	14.1895	14.5715	13.7011	15.033	13.3305	16.0757
483	15.0221	14.8234	15.2273	14.3045	15.7226	14.0826	17.0847
484	13.7288	13.5502	13.9129	13.1799	14.2787	12.5766	14.964
485	14.1916	14.0018	14.3871	13.6245	14.7402	13.2227	15.6439
486	14.6578	14.4654	14.8553	13.9632	15.3318	13.6778	16.5074
487	13.2104	13.0333	13.3949	12.5717	13.8861	11.6841	14.3883
488	13.9059	13.7211	14.0966	13.31	14.505	12.7684	15.2946
489	14.6321	14.4378	14.8314	14.1306	15.1309	13.8786	16.2177
490	14.2637	14.0828	14.4491	13.8083	14.7048	13.4786	15.5908
491	14.2323	14.0524	14.4172	13.7183	14.7594	13.3551	15.6724
492	14.4671	14.2821	14.6585	14.1258	14.8166	13.8729	15.7563
493	15.6713	15.4646	15.8854	15.269	16.0915	15.1899	17.6292
494	14.1064	13.9236	14.2951	13.6029	14.6203	13.1917	15.4629
495	14.6964	14.5085	14.8914	14.0788	15.3595	13.8166	16.5472
496	14.2584	14.086	14.4419	13.6614	14.9003	13.2747	15.879
497	14.6802	14.5106	14.8578	14.07	15.3253	13.8067	16.498
498	14.4102	14.2443	14.5843	13.9224	14.9141	13.625	15.9
499	13.8882	13.7255	14.0596	13.4107	14.3847	12.9134	15.1177
500	14.8758	14.6993	15.0613	14.4148	15.3702	14.2109	16.5633
501	14.5514	14.3713	14.7434	13.7729	15.3868	13.4295	16.5881
502	15.0559	14.874	15.248	14.5175	15.6349	14.3294	16.9577
503	14.6836	14.5053	14.8732	14.1267	15.2876	13.8739	16.4424
504	13.1412	12.9792	13.3145	12.3156	14.0446	11.3078	14.6241
505	13.7324	13.5688	13.9067	13.1791	14.2991	12.5755	14.9947
506	13.8722	13.7069	14.0495	13.3075	14.4427	12.7649	15.2025
507	15.0611	14.8773	15.2563	14.3706	15.776	14.1591	17.1629
508	14.2512	14.0765	14.4368	13.6226	14.8529	13.2197	15.8089
509	15.0373	14.8491	15.2365	14.4319	15.693	14.23	17.0419
510	14.4664	14.2857	14.6592	13.9594	15.0132	13.6722	16.046
511	12.3957	12.2483	12.5527	11.884	12.9515	10.6774	13.1578
512	14.147	13.9733	14.3326	13.605	14.7677	13.1947	15.6848
513	14.7368	14.5604	14.9251	14.154	15.3457	13.9076	16.5274
514	14.1998	14.0398	14.3718	13.6233	14.7348	13.2209	15.6359
515	13.0519	12.9004	13.2169	12.6671	13.4706	11.8253	13.8005
516	14.2649	14.0957	14.4493	13.8275	14.7177	13.5037	15.6103
517	13.6688	13.5106	13.8408	13.2025	14.2084	12.6091	14.8609
518	14.125	13.9514	14.3127	13.6895	14.6322	13.3145	15.4809
519	14.77	14.5906	14.9637	14.2497	15.3868	14.0187	16.5881
520	13.6939	13.5374	13.8643	13.2287	14.2769	12.6484	14.9614
521	13.4087	13.2571	13.5753	12.8618	14.0195	12.111	14.5879
522	12.916	12.7733	13.0717	12.3804	13.5226	11.4025	13.8705
523	13.7446	13.5899	13.9129	13.2609	14.3235	12.6954	15.0314
524	12.6997	12.5616	12.8497	12.2532	13.1978	11.2162	13.4499
525	14.084	13.9246	14.2574	13.57	14.7064	13.1434	15.5932
526	13.7848	13.6269	13.9572	13.2677	14.4378	12.7055	15.1957
527	12.8773	12.7337	13.0336	12.4077	13.3884	11.443	13.6898
528	14.513	14.3429	14.6987	13.8962	15.235	13.5936	16.3669
529	14.2211	14.0582	14.3981	13.5948	14.9311	13.1795	15.9246
530	13.1372	12.9823	13.3069	12.5222	13.9041	11.6111	14.416
531	14.2933	14.1239	14.4785	13.6735	15.0704	13.2919	16.1293
532	13.644	13.4872	13.8144	12.9618	14.378	12.2584	15.108
533	13.7383	13.5765	13.9152	13.0011	14.5521	12.3159	15.3624
534	13.6894	13.5298	13.8628	13.1105	14.3827	12.4746	15.1148
535	14.3877	14.2122	14.5799	13.6026	15.3056	13.1913	16.4695
536	10.9711	10.8542	11.0982	10.5005	11.4704	8.64289	11.4739
537	13.7382	13.5778	13.9132	13.1968	14.4132	12.6009	15.1588
538	11.7011	11.5704	11.8437	11.3877	12.0809	9.94758	12.1634
539	13.275	13.1224	13.4401	12.8406	13.7866	12.0797	14.245
540	12.3194	12.1809	12.4679	11.9005	12.7936	10.7013	12.9774
541	11.5094	11.3756	11.6544	11.0817	12.0176	9.49926	12.0937
542	13.1073	12.9619	13.2604	12.2479	13.8905	11.2084	14.3949
543	11.4206	11.2938	11.5557	10.9898	11.921	9.36445	11.9854
544	11.4071	11.2839	11.5368	10.9032	11.9116	9.23753	11.9747
545	12.3038	12.1682	12.4464	11.6813	12.9117	10.3794	13.1132
546	12.4837	12.3412	12.6345	11.9103	13.0747	10.7155	13.3044
547	12.8386	12.7036	12.9792	12.3361	13.3357	11.3379	13.6232
548	13.554	13.415	13.6978	13.0572	14.0361	12.3972	14.6118
549	11.9311	11.807	12.0612	11.5598	12.3202	10.2005	12.4381
550	12.8113	12.6785	12.9495	12.2847	13.3333	11.2625	13.6203
551	11.7887	11.6628	11.9204	11.4008	12.2393	9.96682	12.3476
552	13.1691	13.0244	13.3196	12.6296	13.7272	11.7703	14.159
553	14.2424	14.0789	14.4135	13.6237	14.9352	13.2216	15.9302
554	13.4419	13.2842	13.6081	12.8491	14.2041	12.092	14.8543
555	13.0129	12.863	13.1703	12.3407	13.7285	11.3447	14.1608
556	14.3445	14.1821	14.5129	13.8843	14.8481	13.5779	15.802
557	12.7963	12.6468	12.9533	12.3119	13.4295	11.3024	13.744
558	14.6946	14.5275	14.868	14.1604	15.3	13.9145	16.4611
559	13.6944	13.5747	13.8082	13.1323	14.2647	12.5068	14.9436
560	11.9154	11.8149	12.0115	11.5411	12.3074	10.1731	12.4237
561	13.6614	13.5414	13.7763	13.221	14.1592	12.6362	14.7897
562	13.6365	13.5159	13.7518	13.1996	14.0941	12.6048	14.6939
563	13.0583	12.9432	13.1687	12.6044	13.5369	11.7337	13.8913
564	12.338	12.2312	12.4403	12.0124	12.6756	10.8646	12.8408
565	12.6499	12.5382	12.7568	12.1444	13.1798	11.0577	13.4278
566	13.0155	12.8996	13.1261	12.5645	13.4985	11.6733	13.8378
567	13.0207	12.9041	13.1313	12.6057	13.4407	11.7356	13.7589
568	13.7606	13.6286	13.8851	13.23	14.3025	12.6502	14.9999
569	12.0963	11.9849	12.2018	11.8053	12.4115	10.5608	12.5417
570	13.9179	13.7874	14.0401	13.1032	14.7309	12.4641	15.6302
571	13.5816	13.4552	13.6997	12.9587	14.1891	12.2538	14.8326
572	12.9446	12.8261	13.055	12.4233	13.4933	11.466	13.8312
573	13.1186	12.9986	13.2308	12.5603	13.6642	11.6672	14.0676
574	10.7026	10.6089	10.7905	10.3353	11.0815	8.40028	11.1357
575	12.2815	12.1697	12.3865	11.8401	12.7606	10.6129	12.9384
576	12.9633	12.8435	13.0762	12.5378	13.3844	11.634	13.6848
577	13.5225	13.3958	13.6415	13.1347	13.9595	12.5103	14.4991
578	12.7344	12.6165	12.845	12.2719	13.2173	11.2437	13.4742
579	12.977	12.8557	13.0904	12.4749	13.5194	11.5417	13.8661
580	13.8588	13.7276	13.9815	13.329	14.4539	12.7957	15.2189
581	14.0075	13.874	14.1321	13.5637	14.4579	13.1339	15.2249
582	12.5218	12.4041	12.6318	12.0424	13.0346	10.9085	13.2571
583	13.1284	13.0043	13.2442	12.5776	13.6869	11.6932	14.0992
584	13.1561	13.0295	13.2743	12.6407	13.7015	11.7865	14.1199
585	12.1816	12.067	12.2883	11.7225	12.6136	10.4405	12.7705
586	13.5142	13.3783	13.6411	13.0015	14.0417	12.3165	14.6198
587	13.9408	13.7988	14.0733	13.4682	14.4471	12.9962	15.2087
588	13.2272	13.0949	13.3509	12.7361	13.7321	11.9263	14.1655
589	11.764	11.6512	11.8699	11.3703	12.1756	9.92199	12.2743
590	14.0161	13.8757	14.1481	13.5359	14.5273	13.093	15.3271
591	13.1614	13.0351	13.2812	12.7896	13.5201	12.0041	13.8671
592	14.2122	14.0732	14.3439	13.6083	14.8026	13.1992	15.7359
593	13.5198	13.3936	13.6403	13.0496	13.9827	12.3865	14.5335
594	14.3867	14.2484	14.5185	13.8998	14.91	13.598	15.8938
595	13.3177	13.1921	13.4379	12.9081	13.7685	12.179	14.219
596	12.753	12.6347	12.8665	12.4038	13.1223	11.4373	13.3604
597	12.6892	12.5713	12.8018	12.2881	13.0898	11.2675	13.3224
598	13.1958	13.0707	13.3152	12.7084	13.6735	11.8856	14.0804
599	13.1958	13.0712	13.3156	12.8582	13.555	12.1055	13.9177
600	13.4858	13.3563	13.6104	12.919	14.0918	12.1952	14.6905
601	13.0526	12.9276	13.173	12.5607	13.5645	11.6677	13.9309
602	14.0901	13.9519	14.2227	13.4987	14.6721	13.0404	15.5414
603	12.1577	12.0435	12.2673	11.7916	12.5489	10.5408	12.6975
604	14.6394	14.4851	14.7884	14.1342	15.1705	13.8834	16.2748
605	13.6504	13.5101	13.7862	13.2165	14.1062	12.629	14.7116
606	14.2771	14.1321	14.4178	13.7892	14.8337	13.452	15.7812
607	12.1964	12.0796	12.3098	11.7637	12.6255	10.5005	12.7842
608	12.4433	12.3165	12.5667	12.0587	12.8716	10.9323	13.0662
609	12.7067	12.5782	12.832	12.2169	13.2087	11.163	13.4624
610	13.282	13.1486	13.412	12.8236	13.7568	12.0541	14.2017
611	12.9793	12.8494	13.106	12.328	13.6236	11.326	14.0131
612	13.6767	13.5387	13.8107	13.1601	14.2048	12.5464	14.8553
613	12.8334	12.7066	12.9569	12.3858	13.3057	11.4106	13.5842
614	12.6008	12.4773	12.7216	12.2327	12.9979	11.1862	13.2126
615	13.0749	12.9454	13.2013	12.5911	13.5728	11.7137	13.9425
616	14.4804	14.3306	14.6265	13.9999	15.0384	13.7226	16.0837
617	12.0315	11.9143	12.146	11.5976	12.4623	10.256	12.5997
618	12.2483	12.1278	12.3657	11.8099	12.6888	10.5675	12.8561
619	12.5454	12.4198	12.6681	12.0668	13.0462	10.9443	13.2707
620	14.3021	14.1539	14.4469	13.7567	14.8986	13.4077	15.8764
621	12.9872	12.8556	13.1157	12.4802	13.5005	11.5494	13.8404
622	13.7075	13.566	13.8461	13.2645	14.1656	12.7004	14.7989
623	13.7665	13.6253	13.9048	13.2044	14.3514	12.6117	15.0703
624	12.6247	12.4976	12.749	12.1748	13.1064	11.1013	13.3413
625	13.1618	13.0271	13.2941	12.6401	13.6665	11.7855	14.0703
626	12.4982	12.3711	12.6226	12.0884	12.9198	10.9759	13.1229
627	11.9369	11.8165	12.0546	11.5748	12.3007	10.2226	12.4164
628	13.3203	13.1812	13.4556	12.802	13.8479	12.0224	14.3327
629	13.243	13.1055	13.3769	12.7462	13.7532	11.9411	14.1969
630	13.5839	13.4431	13.7214	13.056	14.1294	12.3954	14.7461
631	12.7147	12.5841	12.843	12.3175	13.1192	11.3106	13.356
632	13.5831	13.4418	13.7226	13.0841	14.0757	12.4358	14.6681
633	14.45	14.2946	14.6031	13.8916	15.0261	13.5872	16.0655
634	13.9289	13.7816	14.0742	13.3641	14.4902	12.8448	15.2727
635	12.8844	12.752	13.0161	12.4161	13.3206	11.4554	13.6037
636	12.9031	12.7693	13.0365	12.4793	13.3509	11.5482	13.6421
637	13.8255	13.6787	13.9722	13.3226	14.3537	12.7863	15.0735
638	13.5804	13.4363	13.7248	13.1325	14.0522	12.5072	14.6354
639	12.4004	12.2782	12.523	12.022	12.7856	10.8786	12.9675
640	13.4474	13.3111	13.5833	13.0357	13.887	12.3664	14.3897
641	13.5919	13.4528	13.7309	13.1545	14.0368	12.5384	14.6127
642	12.9361	12.8027	13.0697	12.613	13.3058	11.7462	13.5844
643	12.6331	12.505	12.7621	12.2679	13.0072	11.2378	13.224
644	12.6825	12.5517	12.8142	12.3476	13.0386	11.3546	13.262
645	14.2003	14.0504	14.3511	13.7913	14.6109	13.4549	15.4486
646	13.1271	12.988	13.2673	12.8101	13.4566	12.0344	13.7808
647	11.8087	11.6869	11.9321	11.4134	12.2214	9.98522	12.3268
648	12.7255	12.5852	12.8676	12.2925	13.1778	11.2739	13.4255
649	13.9851	13.8313	14.1408	13.3802	14.5756	12.868	15.3957
650	13.4997	13.3525	13.6489	13.0064	13.9971	12.3243	14.5552
651	12.7166	12.5819	12.8525	12.2468	13.1891	11.2069	13.439
652	14.2323	14.0787	14.3864	13.7414	14.7291	13.3864	15.6274
653	13.5644	13.4193	13.7098	13.0561	14.108	12.3955	14.7143
654	13.419	13.2705	13.5677	12.8654	14.0059	12.1166	14.5681
655	12.563	12.4274	12.6979	12.0533	13.0918	10.9245	13.3245
656	13.7432	13.5924	13.8936	13.2229	14.3086	12.6392	15.0093
657	13.8129	13.6624	13.9616	13.356	14.2848	12.8345	14.9729
658	13.2338	13.0906	13.3755	12.7766	13.7267	11.9856	14.1583
659	12.3009	12.1722	12.4284	11.8751	12.7694	10.6645	12.9488
660	13.5343	13.3908	13.6756	13.0873	13.9957	12.4408	14.553
661	12.7352	12.6009	12.8675	12.3723	13.1075	11.3907	13.3425
662	12.4253	12.2954	12.5529	12.0415	12.8116	10.9071	12.9987
663	13.3061	13.1659	13.4431	12.8815	13.715	12.1398	14.1401
664	12.8035	12.6697	12.9347	12.3074	13.3215	11.2958	13.6049
665	13.4064	13.2627	13.5474	12.9011	13.9426	12.1689	14.474
666	12.9133	12.7738	13.0508	12.4584	13.3885	11.5167	13.6899
667	14.1751	14.0177	14.3302	13.7611	14.6059	13.4136	15.4412
668	13.1014	12.9573	13.2437	12.6966	13.5281	11.869	13.8787
669	12.269	12.1382	12.3976	11.9127	12.6472	10.719	12.8088
670	13.4655	13.3224	13.6061	13.0592	13.887	12.4	14.3897
671	13.3784	13.2354	13.5187	12.9624	13.8031	12.2593	14.2685
672	13.3136	13.1669	13.4578	12.9116	13.7282	12.184	14.1603
673	13.3213	13.1755	13.4648	12.9036	13.7496	12.1725	14.1916
674	13.4693	13.3227	13.6132	13.0897	13.8134	12.4444	14.2831
675	13.279	13.1357	13.42	12.8692	13.6957	12.1222	14.1113
676	11.4643	11.3423	11.5843	11.123	11.8292	9.55875	11.8795
677	12.8733	12.7347	13.01	12.5049	13.2434	11.5857	13.5059
678	13.1825	13.0409	13.3225	12.7892	13.5913	12.0036	13.9687
679	12.7669	12.6327	12.8998	12.3742	13.1466	11.3934	13.3893
680	13.5513	13.4087	13.6924	13.1499	13.9434	12.5319	14.4753
681	12.9345	12.7975	13.0706	12.5722	13.2785	11.6849	13.55
682	13.619	13.4746	13.7626	13.243	13.9914	12.6693	14.5463
683	14.2999	14.1454	14.4529	13.8896	14.7253	13.5851	15.6218
684	12.8429	12.7063	12.9789	12.4365	13.27	11.4853	13.5397
685	12.6266	12.4968	12.7556	12.2438	13.0509	11.2024	13.2767
686	13.9215	13.7661	14.0761	13.5183	14.336	13.0684	15.0488
687	12.2997	12.1655	12.4334	11.9738	12.6393	10.8089	12.7998
688	13.6221	13.4736	13.77	13.2449	14.0244	12.6721	14.5948
689	14.0527	13.8954	14.2107	13.6692	14.4638	13.2858	15.2336
690	14.0555	13.9023	14.2094	13.6772	14.4736	13.2969	15.2481
691	13.7124	13.564	13.8617	13.3779	14.0731	12.8642	14.6646
692	12.2494	12.1237	12.376	11.9523	12.5489	10.7771	12.6976
693	13.181	13.0446	13.3176	12.8698	13.5154	12.123	13.8608
694	12.3074	12.1831	12.4327	11.9546	12.6582	10.7807	12.8211
695	13.5508	13.4119	13.6903	13.2363	13.8638	12.6596	14.3556
696	13.8868	13.7438	14.0303	13.5599	14.2131	13.1288	14.8677
697	13.5904	13.4512	13.73	13.2846	13.9017	12.7308	14.4122
698	12.805	12.6783	12.9314	12.4962	13.1117	11.573	13.3476
699	13.7871	13.6497	13.9241	13.4996	14.077	13.0416	14.6699
700	12.3375	12.2191	12.4551	12.0264	12.6611	10.8851	12.8244
701	13.088	12.9603	13.2156	12.7663	13.4406	11.9705	13.7588
702	13.2746	13.1419	13.4074	12.9732	13.5972	12.2751	13.9765
703	13.7641	13.6275	13.8995	13.4175	14.1346	12.9227	14.7538
704	13.8065	13.6851	13.9228	13.4608	14.1653	12.9849	14.7985
705	13.0795	12.9657	13.1883	12.7523	13.3995	11.9499	13.7043
706	13.8663	13.7434	13.9841	13.4753	14.2628	13.0064	14.9409
707	13.612	13.4907	13.7282	13.3066	13.9213	12.7638	14.4425
708	14.4007	14.2736	14.5228	14.0479	14.7632	13.7798	15.678
709	12.4924	12.3837	12.5963	12.2075	12.7784	11.1493	12.9591
710	12.7615	12.6507	12.8671	12.4808	13.0547	11.5503	13.2813
711	13.0899	12.9745	13.1997	12.8011	13.3876	12.021	13.6889
712	12.9652	12.8509	13.0737	12.6829	13.2426	11.8492	13.5049
713	14.0958	13.9712	14.214	13.7175	14.4903	13.354	15.273
714	14.5422	14.411	14.6665	14.1718	14.9201	13.9272	15.909
715	13.2228	13.105	13.3348	12.9299	13.5075	12.212	13.8501
716	14.0627	13.9353	14.1843	13.8014	14.3442	13.4694	15.0602
717	14.5176	14.3869	14.6424	14.1605	14.8934	13.9146	15.8685
718	14.5702	14.4392	14.6955	14.1668	15.0103	13.9209	16.0417
719	13.8302	13.7047	13.9507	13.4974	14.179	13.0385	14.8182
720	13.2128	13.0943	13.3269	12.9063	13.534	12.1763	13.8869
721	14.7145	14.58	14.8443	14.4065	15.0502	14.2008	16.1006
722	13.7174	13.5899	13.8403	13.4191	14.025	12.9251	14.5957
723	13.8029	13.6765	13.9246	13.4434	14.1772	12.9596	14.8155
724	13.9917	13.8632	14.1155	13.6402	14.343	13.2458	15.0585
725	14.4799	14.3455	14.6091	14.1111	14.8428	13.8561	15.7944
726	14.6464	14.5095	14.778	14.3166	14.9824	14.097	15.9998
727	13.8696	13.7427	13.9916	13.5375	14.2341	13.0956	14.8992
728	13.9214	13.7936	14.0443	13.6089	14.2379	13.2	14.9047
729	14.9105	14.7697	15.0461	14.5669	15.2657	14.386	16.4105
730	15.1166	14.9723	15.2557	14.8262	15.4423	14.6804	16.6706
731	12.836	12.7184	12.9498	12.5586	13.1259	11.6645	13.364
732	14.481	14.35	14.6085	14.1365	14.824	13.886	15.7671
733	13.6097	13.4864	13.7298	13.3261	13.9199	12.7914	14.4403
734	14.3548	14.2226	14.4837	13.9921	14.7317	13.7128	15.6312
735	13.8191	13.6935	13.9415	13.4567	14.1898	12.9784	14.8336
736	14.6512	14.5142	14.7848	14.2567	15.0417	14.0265	16.0885
737	14.3291	14.1984	14.4562	13.9238	14.7378	13.6269	15.6404
738	13.3809	13.2607	13.4978	13.03	13.7578	12.3578	14.2033
739	13.5661	13.4438	13.685	13.1455	13.994	12.5256	14.5504
740	13.0552	12.9367	13.1707	12.7481	13.3799	11.9438	13.6789
741	13.5393	13.4154	13.6599	13.2163	13.8801	12.6287	14.3791
742	14.3016	14.1686	14.4311	13.9237	14.6988	13.6268	15.5817
743	13.9538	13.8256	14.0783	13.5034	14.4088	13.0474	15.1525
744	13.4941	13.3693	13.6152	13.0904	13.8968	12.4453	14.4046
745	13.4421	13.3172	13.563	13.0785	13.8298	12.4272	14.3062
746	13.6541	13.5231	13.7805	13.3047	14.0193	12.7611	14.5876
747	14.8508	14.7104	14.9859	14.4425	15.3199	14.2428	16.4901
748	13.7383	13.6096	13.8622	13.3636	14.1181	12.8441	14.7301
749	14.7582	14.6191	14.892	14.3938	15.1479	14.1863	16.2423
750	14.3421	14.205	14.4737	13.9503	14.7585	13.66	15.6711
751	15.4551	15.3056	15.5991	15.0923	15.863	14.9871	17.2895
752	14.3384	14.203	14.4687	14.0339	14.6844	13.7628	15.56
753	15.1094	14.9652	15.248	14.7622	15.4811	14.6083	16.7291
754	15.1479	15.0002	15.29	14.8547	15.4692	14.7136	16.7112
755	14.7823	14.6394	14.9197	14.4128	15.1931	14.2084	16.3072
756	13.5037	13.3746	13.6285	13.2298	13.8041	12.6499	14.2699
757	15.7363	15.5798	15.8873	15.4183	16.0596	15.3598	17.5823
758	15.2158	15.0659	15.3603	14.8963	15.5578	14.7615	16.8446
759	14.5708	14.4303	14.7057	14.2072	14.9587	13.9701	15.964
760	15.8121	15.6558	15.9625	15.495	16.1691	15.4472	17.7435
761	15.2782	15.1279	15.4229	14.9324	15.6538	14.8022	16.985
762	13.2683	13.141	13.3913	12.9196	13.6413	12.196	14.0373
763	14.8871	14.737	15.032	14.5832	15.232	14.4062	16.3627
764	14.387	14.2439	14.5251	14.0418	14.7635	13.7722	15.6786
765	14.2143	14.0733	14.3503	13.817	14.6206	13.4908	15.4634
766	12.8357	12.711	12.956	12.4611	13.2278	11.5207	13.4866
767	14.2627	14.1198	14.401	13.8205	14.7015	13.4953	15.5858
768	14.595	14.4485	14.7368	14.2393	14.9616	14.0069	15.9684
769	13.8729	13.7354	14.0063	13.4525	14.3017	12.9717	14.9987
770	13.4575	13.3248	13.5861	13.1256	13.8135	12.4968	14.2833
771	15.1368	14.9833	15.2861	14.7064	15.5606	14.5447	16.8488
772	13.2282	13.0969	13.3562	12.8546	13.601	12.1002	13.9816
773	14.5009	14.3507	14.6478	14.1401	14.8771	13.8901	15.8441
774	14.7798	14.6244	14.932	14.4078	15.1582	14.2023	16.2571
775	15.0686	14.9135	15.2206	14.6249	15.5281	14.4522	16.8001
776	13.1606	13.0318	13.2865	12.7899	13.528	12.0046	13.8786
777	14.8915	14.7423	15.0373	14.5083	15.2942	14.3189	16.4524
778	15.2723	15.1181	15.4234	14.8517	15.7015	14.7102	17.0542
779	15.3111	15.1568	15.4621	14.9283	15.7186	14.7975	17.0789
780	15.0462	14.8961	15.1931	14.6127	15.4918	14.4386	16.7452
781	12.6097	12.4879	12.7289	12.2336	12.9894	11.1874	13.2027
782	13.4018	13.2717	13.5293	12.9706	13.844	12.271	14.327
783	12.59	12.4698	12.7076	12.2213	12.9816	11.1694	13.1935
784	12.8962	12.7711	13.0186	12.4649	13.3199	11.5266	13.6027
785	13.6411	13.5057	13.7733	13.212	14.0586	12.6225	14.6444
786	13.6658	13.5315	13.7964	13.2518	14.0734	12.6822	14.6649
787	13.7839	13.6472	13.9171	13.3558	14.2109	12.8342	14.8644
788	13.5771	13.4464	13.7039	13.1603	14.0196	12.5467	14.588
789	12.9515	12.8273	13.0718	12.5848	13.3248	11.7041	13.6092
790	15.1642	15.0137	15.3104	14.7884	15.5858	14.6379	16.8865
791	13.8398	13.7055	13.9703	13.4973	14.2036	13.0384	14.8535
792	15.335	15.1824	15.4836	14.9312	15.7626	14.8008	17.1434
793	14.661	14.516	14.8024	14.3124	15.0482	14.0921	16.0976
794	13.7736	13.6399	13.9038	13.3934	14.1972	12.8877	14.8446
795	13.2097	13.0793	13.3365	12.886	13.5711	12.1465	13.9403
796	13.3226	13.1902	13.4518	12.9935	13.682	12.3045	14.0925
797	13.2892	13.1586	13.4157	12.9079	13.698	12.1787	14.1144
798	14.0364	13.8973	14.1711	13.6173	14.4591	13.2117	15.2268
799	13.7629	13.6268	13.8949	13.3515	14.2034	12.8283	14.8533
800	11.657	11.5454	11.7657	11.3759	11.9668	9.93019	12.0364
801	13.2852	13.1548	13.4123	12.9536	13.6287	12.246	14.0198
802	13.1504	13.0227	13.2749	12.8148	13.5152	12.0416	13.8605
803	12.8184	12.6918	12.9418	12.4859	13.1685	11.5578	13.4142
804	13.2477	13.1167	13.3756	12.9001	13.5707	12.1674	13.9398
805	13.0899	12.96	13.2168	12.761	13.426	11.9627	13.7395
806	13.3068	13.1745	13.4364	12.9409	13.6753	12.2284	14.0828
807	13.5478	13.4127	13.6805	13.1671	13.9522	12.5567	14.4878
808	13.262	13.1291	13.3923	12.8497	13.6898	12.0928	14.1033
809	12.6545	12.5283	12.7781	12.3488	12.9729	11.3563	13.1833
810	13.3305	13.1964	13.4622	12.9483	13.7089	12.2383	14.1312
811	14.3499	14.2035	14.4937	13.9084	14.8125	13.6085	15.7503
812	13.3591	13.226	13.4898	12.9646	13.7857	12.2625	14.2436
813	13.9135	13.7723	14.0523	13.5085	14.341	13.0546	15.0558
814	12.6452	12.5175	12.7707	12.2835	13.0311	11.2607	13.2527
815	13.3597	13.2251	13.4923	13.0311	13.7048	12.3595	14.1249
816	14.3318	14.1841	14.4779	13.9702	14.6998	13.6858	15.5832
817	12.9799	12.8488	13.1095	12.6601	13.3235	11.8148	13.6075
818	12.721	12.5926	12.8479	12.4055	13.0573	11.4398	13.2847
819	13.3736	13.237	13.5085	13.0057	13.7684	12.3233	14.2189
820	14.467	14.316	14.6163	14.0382	14.9042	13.7678	15.8849
821	14.158	14.0104	14.3039	13.7769	14.5529	13.4349	15.3636
822	13.6669	13.5239	13.8086	13.3129	14.0263	12.7726	14.5975
823	14.0042	13.8564	14.1503	13.6336	14.4096	13.2367	15.1536
824	13.4725	13.3298	13.6139	13.0184	13.9182	12.3409	14.4378
825	14.3031	14.1477	14.4571	13.9541	14.6916	13.6658	15.5709
826	14.9542	14.7924	15.1144	14.525	15.4016	14.3387	16.6101
827	14.9648	14.7985	15.1298	14.5769	15.3683	14.3985	16.5605
828	14.1816	14.026	14.3361	13.8599	14.5348	13.5467	15.3376
829	14.3439	14.1856	14.5009	13.9738	14.7427	13.69	15.6476
830	14.4554	14.2952	14.6143	14.0901	14.8297	13.8309	15.7753
831	13.8819	13.7273	14.0351	13.5418	14.2555	13.1022	14.9304
832	14.399	14.2364	14.5606	14.0397	14.7802	13.7698	15.7034
833	14.8808	14.7125	15.0475	14.5216	15.2642	14.3345	16.4085
834	13.3663	13.2176	13.5135	13.0268	13.7534	12.3532	14.1972
835	14.4338	14.2709	14.5956	14.1128	14.7639	13.858	15.6791
836	13.7696	13.6157	13.9216	13.4242	14.1372	12.9325	14.7576
837	15.5991	15.4225	15.7745	15.2485	15.9743	15.1661	17.4574
838	14.3697	14.2108	14.5272	13.9894	14.7744	13.7091	15.6947
839	14.7571	14.5913	14.9211	14.4045	15.1368	14.1988	16.2263
840	13.6749	13.5225	13.8255	13.3363	14.051	12.8064	14.6337
841	13.9339	13.7769	14.0897	13.6124	14.2683	13.2049	14.949
842	14.1037	13.9447	14.2614	13.7878	14.447	13.45	15.2087
843	14.076	13.9154	14.2351	13.7218	14.4464	13.3598	15.2077
844	13.2765	13.1252	13.4262	12.973	13.6135	12.2748	13.9993
845	15.1227	14.9462	15.2983	14.7521	15.4991	14.5963	16.7563
846	13.9631	13.8031	14.1221	13.6412	14.2973	13.247	14.992
847	13.7923	13.6332	13.9507	13.45	14.1677	12.968	14.802
848	13.5254	13.3702	13.6799	13.2241	13.8535	12.6412	14.3411
849	14.2061	14.043	14.368	13.8644	14.5517	13.5522	15.3618
850	14.6661	14.498	14.8326	14.2625	15.0578	14.0331	16.1113
851	13.2759	13.1255	13.4254	12.9551	13.6314	12.2481	14.0234
852	13.2545	13.1037	13.4043	12.9163	13.6208	12.191	14.0093
853	12.9686	12.8211	13.1154	12.633	13.3328	11.7752	13.6196
854	13.8644	13.7019	14.0264	13.5435	14.1988	13.1049	14.8469
855	14.8159	14.6398	14.9911	14.4338	15.1927	14.2322	16.3068
856	13.7864	13.6238	13.9483	13.47	14.128	12.9989	14.7441
857	13.8261	13.6643	13.9862	13.4138	14.2618	12.9175	14.9395
858	13.183	13.0274	13.3378	12.8996	13.4937	12.1667	13.8317
859	13.6294	13.4662	13.7919	13.313	13.9693	12.7726	14.5138
860	14.1006	13.9332	14.2671	13.6839	14.5278	13.3063	15.3277
861	13.0807	12.9249	13.2363	12.736	13.4535	11.9262	13.7763
862	13.4686	13.3071	13.6298	13.1151	13.8496	12.4814	14.3352
863	13.5523	13.3895	13.7144	13.1765	13.9246	12.5717	14.4474
864	14.2456	14.0727	14.4176	13.8438	14.643	13.5259	15.4973
865	12.3567	12.2109	12.5019	12.0674	12.6617	10.9451	12.8251
866	13.5795	13.4149	13.7433	13.2261	13.9407	12.6444	14.4711
867	13.7291	13.5647	13.8924	13.3787	14.0908	12.8656	14.6891
868	14.3288	14.1531	14.5034	13.984	14.6917	13.7031	15.571
869	14.759	14.5743	14.9432	14.3917	15.1521	14.1839	16.2483
870	13.8437	13.674	14.0125	13.4926	14.2286	13.0311	14.8905
871	14.8049	14.6192	14.9894	14.4388	15.2129	14.2383	16.3354
872	13.8497	13.6768	14.0216	13.5241	14.23	13.077	14.8928
873	14.5732	14.3902	14.7553	14.2058	14.9469	13.9683	15.9465
874	13.8855	13.7109	14.0592	13.5343	14.2581	13.0908	14.9341
875	14.4347	14.2505	14.6191	14.0687	14.8024	13.8052	15.7357
876	14.9579	14.7633	15.1534	14.629	15.3047	14.4567	16.4681
877	14.124	13.9452	14.3023	13.6699	14.6224	13.2866	15.466
878	14.7459	14.5541	14.9383	14.3722	15.1467	14.1611	16.2405
879	13.8771	13.6972	14.058	13.5228	14.2689	13.075	14.9498
880	14.803	14.6091	14.9978	14.4515	15.1755	14.2533	16.2819
881	12.5609	12.4009	12.7219	12.2317	12.9315	11.1847	13.1353
882	14.2425	14.0583	14.4281	13.8634	14.599	13.551	15.4307
883	14.6133	14.4195	14.8082	14.2421	14.9932	14.01	16.0159
884	14.0414	13.8556	14.2278	13.7057	14.3998	13.3374	15.1394
885	15.1406	14.9367	15.3451	14.7573	15.5311	14.6024	16.8046
886	14.8348	14.6347	15.0353	14.5044	15.1992	14.3142	16.3159
887	15.2641	15.0545	15.4748	14.8855	15.6711	14.7496	17.0103
888	13.767	13.5809	13.9543	13.3878	14.1846	12.8796	14.8262
889	14.2076	14.0142	14.4032	13.7596	14.6956	13.4113	15.5769
890	14.8234	14.6178	15.0319	14.4112	15.2568	14.2064	16.398
891	16.1701	15.9429	16.3989	15.7754	16.591	15.769	18.3661
892	13.929	13.7406	14.1184	13.488	14.3921	13.0246	15.1284
893	14.5055	14.3036	14.7099	14.0892	14.9442	13.8297	15.9427
894	14.8169	14.6107	15.0255	14.3826	15.2652	14.1729	16.4099
895	14.6579	14.4596	14.856	14.2468	15.0861	14.0153	16.1516
896	14.2646	14.0718	14.458	13.889	14.6708	13.5842	15.5394
897	14.9129	14.7064	15.1199	14.5356	15.3138	14.3518	16.4813
898	13.9675	13.7756	14.1603	13.5998	14.3561	13.1873	15.0768
899	15.1168	14.9071	15.3282	14.7348	15.5013	14.5763	16.7596
900	12.9804	12.8057	13.1571	12.5967	13.3752	11.7222	13.6729
901	13.501	13.3172	13.6872	13.1094	13.8984	12.4732	14.4071
902	12.7825	12.6065	12.9626	12.4206	13.1535	11.4619	13.3968
903	13.1177	12.9373	13.3019	12.7544	13.5002	11.9531	13.84
904	14.0491	13.8551	14.247	13.6512	14.4619	13.2606	15.2308
905	13.9564	13.765	14.1519	13.5843	14.3472	13.1638	15.0645
906	14.2336	14.0377	14.4339	13.8269	14.6487	13.5028	15.5059
907	13.0509	12.8744	13.2305	12.7159	13.4111	11.8965	13.7193
908	13.9355	13.743	14.1324	13.5912	14.2916	13.1748	14.9833
909	13.8279	13.636	14.0248	13.4697	14.1831	12.9984	14.824
910	13.6213	13.4323	13.8151	13.2459	14.0173	12.6735	14.5847
911	13.1593	12.9765	13.3473	12.7674	13.5614	11.9721	13.9264
912	15.2335	15.015	15.4579	14.8394	15.641	14.6962	16.9665
913	13.721	13.5259	13.9222	13.3388	14.1152	12.8101	14.7256
914	13.1559	12.969	13.3489	12.8158	13.5212	12.043	13.8685
915	14.7697	14.5537	14.9929	14.3716	15.169	14.1604	16.2726
916	14.2116	14.0056	14.4245	13.7873	14.6661	13.4491	15.5323
917	13.5638	13.365	13.7702	13.154	14.0044	12.5377	14.566
918	14.0688	13.8611	14.2836	13.6522	14.5037	13.262	15.2928
919	14.9574	14.7332	15.1896	14.5621	15.3687	14.3801	16.5611
920	14.6712	14.4498	14.9012	14.2184	15.1352	13.9829	16.2239
921	13.5169	13.3187	13.7228	13.0879	13.99	12.4416	14.5443
922	15.2111	14.9845	15.4454	14.748	15.6841	14.5913	17.029
923	14.2319	14.0233	14.4479	13.7806	14.7036	13.4401	15.5889
924	15.0296	14.8143	15.2508	14.5915	15.477	14.4154	16.7229
925	14.7652	14.5529	14.9844	14.3512	15.197	14.1374	16.3129
926	15.0561	14.8363	15.2829	14.6464	15.486	14.4758	16.7366
927	14.2128	14.006	14.4267	13.7797	14.6601	13.4389	15.5231
928	15.5981	15.3687	15.8349	15.1982	16.0208	15.1057	17.5254
929	15.0796	14.8591	15.3077	14.6622	15.5123	14.4949	16.7763
930	15.8055	15.5718	16.0475	15.4411	16.2044	15.3857	17.7964
931	15.2449	15.0251	15.4721	14.8528	15.6412	14.7115	16.9668
932	15.5844	15.3558	15.8208	15.1968	16.0042	15.1041	17.5013
933	15.5106	15.2881	15.7404	15.1281	15.917	15.0273	17.371
934	15.9971	15.7673	16.2336	15.5786	16.4142	15.5436	18.1103
935	15.3129	15.0952	15.5372	14.9623	15.6805	14.8362	17.0239
936	14.7455	14.5413	14.9552	14.31	15.1893	14.0892	16.3019
937	14.528	14.3212	14.7415	14.1469	14.9066	13.8989	15.8886
938	13.9619	13.763	14.1676	13.5989	14.3256	13.1858	15.0343
939	14.9638	14.7534	15.1799	14.5949	15.3331	14.4191	16.5092
940	12.6624	12.4894	12.8408	12.2837	13.0541	11.261	13.2806
941	14.2283	14.0313	14.431	13.8151	14.6712	13.4884	15.54
942	14.5748	14.3742	14.7807	14.1588	14.9655	13.9128	15.9743
943	14.455	14.2552	14.6603	14.0289	14.8764	13.7573	15.843
944	15.2251	15.0173	15.4376	14.8216	15.6335	14.675	16.9556
945	15.5102	15.3002	15.7248	15.153	15.861	15.0547	17.2864
946	15.2734	15.0677	15.4835	14.8724	15.6852	14.7337	17.0305
947	15.1841	14.9768	15.3963	14.7979	15.5644	14.6488	16.8545
948	13.8856	13.6997	14.0758	13.5346	14.217	13.0912	14.8734
949	14.0619	13.8717	14.2574	13.7036	14.4104	13.3344	15.1548
950	14.1304	13.9411	14.3249	13.7914	14.475	13.4551	15.2502
951	15.6043	15.3849	15.8311	15.2449	15.9849	15.1617	17.4729
952	13.8057	13.6185	13.9984	13.4686	14.1391	12.9968	14.7605
953	14.4485	14.2492	14.6538	14.1105	14.7811	13.8555	15.7046
954	13.7165	13.5238	13.9156	13.3818	14.041	12.8706	14.6188
955	14.1981	13.9989	14.4032	13.8486	14.5313	13.5317	15.3326
956	13.6717	13.4797	13.8697	13.3557	14.0122	12.834	14.5772
957	14.5086	14.301	14.7233	14.1488	14.8662	13.9012	15.8283
958	12.9527	12.7727	13.1388	12.5938	13.3217	11.7178	13.6052
959	14.4032	14.1968	14.6176	14.0324	14.7679	13.7612	15.6851
960	14.5369	14.3259	14.7561	14.1886	14.901	13.9469	15.8801
961	12.2176	12.0501	12.3905	11.9196	12.516	10.729	12.6606
962	14.3125	14.1016	14.5324	13.9118	14.7341	13.6126	15.6349
963	14.5048	14.2957	14.7217	14.1446	14.8818	13.8959	15.851
964	14.9659	14.7433	15.1981	14.5692	15.4	14.3889	16.6078
965	13.4083	13.2097	13.6163	13.0673	13.7756	12.4115	14.2291
966	13.4773	13.2762	13.6885	13.1085	13.8613	12.4719	14.352
967	14.3013	14.0851	14.5291	13.9455	14.691	13.6547	15.5699
968	13.6679	13.4629	13.8841	13.2615	14.1164	12.6963	14.7274
969	14.6758	14.4525	14.9119	14.2861	15.0894	14.0607	16.1563
970	13.9249	13.7166	14.1447	13.5775	14.2852	13.154	14.9735
971	14.8008	14.5738	15.0407	14.4185	15.2088	14.2155	16.3296
972	15.782	15.5306	16.0494	15.3566	16.2357	15.2897	17.8433
973	14.8168	14.585	15.0629	14.4534	15.2047	14.2555	16.3238
974	13.6762	13.4666	13.8984	13.2725	14.0768	12.7127	14.6696
975	14.6519	14.4187	14.9001	14.2584	15.0482	14.0284	16.0976
976	13.4287	13.2176	13.6535	13.035	13.8072	12.3653	14.2743
977	14.5823	14.3502	14.8296	14.1648	14.9977	13.9188	16.0227
978	15.0138	14.7718	15.2729	14.5672	15.4648	14.3864	16.7046
979	12.893	12.6897	13.1108	12.5295	13.2739	11.6218	13.5445
980	14.1634	13.9362	14.4071	13.7536	14.5867	13.403	15.4121
981	13.8285	13.6038	14.0705	13.4965	14.1813	13.0371	14.8214
982	15.8933	15.6294	16.1788	15.4464	16.345	15.3918	18.0069
983	15.0164	14.7708	15.2809	14.601	15.4575	14.4258	16.6936
984	14.2079	13.9795	14.4536	13.7967	14.6172	13.4624	15.4582
985	13.7695	13.5601	13.9918	13.393	14.1613	12.8869	14.7926
986	15.2062	14.9731	15.4531	14.7772	15.6273	14.6256	16.9467
987	14.6864	14.459	14.9273	14.2853	15.1007	14.0597	16.1727
988	14.3318	14.1069	14.571	13.9091	14.7667	13.6093	15.6833
989	13.0981	12.9104	13.2932	12.7202	13.4756	11.9029	13.8069
990	15.4042	15.1805	15.6369	14.9355	15.8655	14.8056	17.2933
991	14.2177	14.0168	14.4276	13.824	14.596	13.4993	15.4262
992	14.4622	14.2552	14.6791	14.0558	14.8727	13.7892	15.8376
993	14.0918	13.898	14.2942	13.73	14.4402	13.3714	15.199
994	14.6851	14.4821	14.8975	14.2681	15.1169	14.039	16.197
995	15.1767	14.9614	15.4021	14.744	15.597	14.5866	16.9027
996	14.3401	14.1361	14.5544	13.9823	14.7142	13.7011	15.6051
997	15.126	14.9082	15.3545	14.6828	15.5745	14.5186	16.8696
998	14.1983	13.9973	14.4116	13.7977	14.6146	13.4636	15.4543
999	14.4445	14.2396	14.6617	14.0208	14.8725	13.7475	15.8374
1000	15.4117	15.1844	15.6531	15.0009	15.8412	14.8799	17.2576
1001	15.0973	14.8825	15.3234	14.6943	15.5047	14.5313	16.7648
1002	15.3214	15.0999	15.5542	14.9093	15.7347	14.7756	17.1022
1003	14.545	14.3361	14.765	14.1781	14.9173	13.9345	15.9048
1004	14.6035	14.4096	14.802	14.2438	14.9824	14.0118	15.9998
1005	14.1717	13.9839	14.3647	13.812	14.5612	13.4839	15.3754
1006	15.0065	14.807	15.2115	14.6199	15.3929	14.4466	16.5972
1007	14.7706	14.573	14.9735	14.388	15.1745	14.1795	16.2806
1008	13.2098	13.0383	13.3858	12.8677	13.5934	12.1201	13.9716
1009	14.2652	14.0802	14.4554	13.8897	14.6485	13.5851	15.5056
1010	14.2028	14.0181	14.393	13.7923	14.599	13.4562	15.4309
1011	14.7067	14.5128	14.9057	14.297	15.1242	14.0738	16.208
1012	14.3165	14.1301	14.5089	13.9199	14.7201	13.6221	15.6139
1013	13.8214	13.6388	14.0112	13.4062	14.2838	12.9069	14.9714
1014	14.0721	13.8826	14.2703	13.6855	14.5149	13.3084	15.3093
1015	13.6029	13.4259	13.7874	13.2295	13.9882	12.6495	14.5414
1016	14.6384	14.4486	14.8347	14.2036	15.0989	13.9655	16.17
1017	13.7367	13.5598	13.9206	13.3257	14.1781	12.7909	14.8168
1018	15.0793	14.8799	15.287	14.6592	15.5165	14.4913	16.7827
1019	15.8271	15.6168	16.0466	15.3824	16.2967	15.3191	17.9346
1020	15.3692	15.1667	15.581	14.9235	15.8458	14.7918	17.2643
1021	14.9575	14.7591	15.1651	14.5216	15.4111	14.3345	16.6239
1022	14.37	14.1768	14.5722	13.9606	14.8137	13.6741	15.7521
1023	13.7566	13.5748	13.9468	13.3738	14.1753	12.8585	14.8128
1024	14.4012	14.2125	14.5982	14.0063	14.7991	13.7302	15.7309
1025	15.7782	15.5684	15.9972	15.3306	16.2374	15.2598	17.8458
1026	14.2586	14.0697	14.456	13.8907	14.6353	13.5862	15.4856
1027	14.4348	14.2386	14.6406	13.9987	14.8955	13.7212	15.8717
1028	14.5292	14.3308	14.7378	14.1202	14.9679	13.867	15.9779
1029	14.6173	14.4197	14.8262	14.193	15.0516	13.9521	16.1025
1030	15.053	14.8452	15.2736	14.5739	15.5243	14.3949	16.7944
1031	13.909	13.7182	14.1118	13.406	14.4509	12.9066	15.2145
1032	13.8139	13.6241	14.0147	13.3979	14.267	12.8944	14.9471
1033	15.2699	15.0593	15.4923	14.8297	15.7118	14.6846	17.0691
1034	15.0051	14.8305	15.181	14.5601	15.408	14.3776	16.6195
1035	14.4043	14.2325	14.5781	14.0143	14.7758	13.7398	15.6968
1036	14.7918	14.6161	14.9691	14.3775	15.2068	14.1671	16.3267
1037	15.7136	15.5179	15.9112	15.3139	16.1235	15.2406	17.6761
1038	14.4515	14.2758	14.6289	14.0681	14.8436	13.8044	15.7954
1039	14.6621	14.4831	14.8435	14.3143	15.0378	14.0944	16.0829
1040	15.0863	14.9004	15.2743	14.7081	15.4788	14.5466	16.7257
1041	13.557	13.391	13.7252	13.203	13.9275	12.6097	14.4518
1042	13.5353	13.37	13.7026	13.2021	13.8976	12.6084	14.4058
1043	13.987	13.8137	14.1627	13.6674	14.3295	13.2834	15.0397
1044	13.9471	13.7708	14.1265	13.512	14.3945	13.0596	15.1318
1045	13.9799	13.8032	14.1589	13.591	14.3904	13.1745	15.1259
1046	14.2735	14.0931	14.4562	13.8802	14.686	13.5731	15.5625
1047	13.4122	13.2469	13.58	13.0379	13.8122	12.3698	14.2814
1048	15.1103	14.9172	15.3067	14.6997	15.5639	14.5373	16.8537
1049	14.4129	14.2289	14.6006	14.1016	14.7376	13.8446	15.6401
1050	13.3978	13.2316	13.5673	13.0832	13.7375	12.4344	14.1728
1051	15.7879	15.5808	16.0005	15.3494	16.2334	15.2814	17.8399
1052	15.4666	15.2678	15.6715	15.0883	15.8559	14.9824	17.279
1053	13.2687	13.1011	13.4415	12.8857	13.6637	12.1461	14.0669
1054	14.6996	14.5125	14.8923	14.3272	15.0518	14.1098	16.1028
1055	14.4388	14.2514	14.6324	14.0859	14.8199	13.8253	15.7611
1056	14.651	14.4608	14.847	14.2312	15.0642	13.9978	16.1204
1057	15.2344	15.0336	15.4418	14.8528	15.6236	14.7115	16.9412
1058	15.7118	15.504	15.9259	15.2932	16.1207	15.2175	17.672
1059	14.4073	14.2188	14.6015	13.9694	14.8468	13.685	15.8001
1060	14.9302	14.7324	15.1338	14.531	15.3431	14.3462	16.5236
1061	15.5121	15.3038	15.7274	15.0705	15.9516	14.9615	17.4233
1062	15.6875	15.4766	15.9061	15.2657	16.1308	15.1861	17.6869
1063	14.1927	14.0021	14.3907	13.8058	14.5984	13.4757	15.4299
1064	14.86	14.6577	15.0696	14.4269	15.295	14.2244	16.4536
1065	14.7034	14.502	14.9131	14.368	15.0682	14.1563	16.1261
1066	14.5319	14.3326	14.7398	14.1338	14.9542	13.883	15.9572
1067	13.9083	13.718	14.1071	13.5508	14.2814	13.1164	14.9679
1068	13.2256	13.048	13.4131	12.8552	13.6071	12.1012	13.9898
1069	13.7001	13.5136	13.8968	13.3265	14.0787	12.792	14.6722
1070	13.8854	13.6981	14.0822	13.51	14.2912	13.0568	14.9827
1071	14.4397	14.2353	14.6565	14.0556	14.8687	13.789	15.8318
1072	14.1949	14.0149	14.3796	13.8467	14.5565	13.5295	15.3686
1073	14.0839	13.9059	14.2674	13.671	14.5052	13.2881	15.2949
1074	14.0918	13.9136	14.2755	13.6877	14.5188	13.3117	15.3151
1075	13.7224	13.5501	13.9005	13.3189	14.1653	12.7811	14.7985
1076	14.1972	14.017	14.3841	13.8158	14.6218	13.4893	15.4652
1077	13.4696	13.299	13.6463	13.1419	13.8362	12.5208	14.3152
1078	13.9622	13.7867	14.144	13.5374	14.4046	13.0955	15.1464
1079	15.0641	14.8703	15.2651	14.6608	15.4954	14.4933	16.7507
1080	15.0747	14.881	15.2764	14.6867	15.5028	14.5229	16.762
1081	14.5888	14.4038	14.7819	14.1742	15.0432	13.9302	16.0906
1082	14.2896	14.1107	14.4755	13.8645	14.7379	13.5523	15.6405
1083	13.6285	13.4561	13.8082	13.2913	14.0164	12.7409	14.5833
1084	14.7982	14.6046	15.001	14.4254	15.214	14.2228	16.337
1085	14.3859	14.2016	14.5786	14.0419	14.7651	13.7724	15.6809
1086	15.9882	15.7786	16.2078	15.5439	16.4748	15.5033	18.1981
1087	14.7635	14.573	14.9626	14.3694	15.2172	14.1578	16.3415
1088	15.1657	14.971	15.3686	14.8035	15.5698	14.6548	16.8626
1089	15.0443	14.8501	15.2462	14.6604	15.4704	14.4927	16.713
1090	15.0223	14.8269	15.2259	14.6717	15.4276	14.506	16.6484
1091	15.5464	15.3476	15.7505	15.067	16.0906	14.9574	17.6279
1092	16.1894	15.9831	16.4011	15.804	16.6232	15.8011	18.4126
1093	14.9375	14.7519	15.1277	14.5722	15.332	14.3927	16.5076
1094	14.7737	14.5899	14.9623	14.3939	15.1744	14.1864	16.2804
1095	13.5996	13.4296	13.7749	13.2503	13.9853	12.68	14.5372
1096	13.5658	13.3976	13.7392	13.2662	13.9099	12.7031	14.425
1097	14.7152	14.5252	14.9122	14.3943	15.0861	14.1868	16.1516
1098	14.4174	14.2322	14.6092	14.04	14.8254	13.7701	15.7691
1099	14.0832	13.9007	14.273	13.6927	14.4999	13.3194	15.2871
1100	14.0779	13.8972	14.2647	13.7395	14.4432	13.3838	15.2032
1101	14.6596	14.4667	14.8603	14.2475	15.0859	14.0162	16.1514
1102	14.8239	14.6306	15.0248	14.4215	15.2559	14.2187	16.3967
1103	14.9493	14.7536	15.1532	14.5324	15.3763	14.348	16.5725
1104	15.5362	15.3276	15.7535	15.1542	15.9638	15.056	17.4418
1105	14.7032	14.5087	14.905	14.3322	15.1183	14.1154	16.1991
1106	15.1702	14.9624	15.3866	14.6458	15.7266	14.4752	17.0906
1107	13.4321	13.2528	13.6197	13.04	13.8494	12.3727	14.335
1108	13.6221	13.4399	13.8116	13.1922	14.086	12.5942	14.6822
1109	12.3774	12.2192	12.5407	11.9634	12.8015	10.7937	12.9864
1110	12.9913	12.8229	13.1665	12.5265	13.4812	11.6174	13.8149
1111	12.6552	12.499	12.816	12.251	13.075	11.213	13.3047
1112	13.6181	13.4493	13.7915	13.2338	14.0392	12.6559	14.6161
1113	15.0644	14.874	15.2606	14.6678	15.4695	14.5016	16.7117
1114	14.6818	14.4965	14.873	14.3203	15.0675	14.1019	16.1251
1115	13.3319	13.1667	13.5019	12.9742	13.7095	12.2767	14.1321
1116	13.8716	13.6969	14.0519	13.5069	14.2545	13.0523	14.9289
1117	13.0125	12.8534	13.1761	12.6421	13.4009	11.7884	13.7062
1118	13.9358	13.7597	14.1179	13.4839	14.3863	13.0189	15.12
1119	13.1733	13.012	13.3407	12.704	13.6432	11.8794	14.0397
1120	13.6964	13.5282	13.8705	13.291	14.1202	12.7404	14.733
1121	13.3172	13.1535	13.4868	12.9446	13.7194	12.2333	14.1469
1122	14.2791	14.1002	14.4645	13.8042	14.7694	13.4735	15.6873
1123	14.6874	14.5062	14.8742	14.2456	15.1709	14.0139	16.2753
1124	13.6151	13.4459	13.7906	13.1126	14.163	12.4777	14.7951
1125	13.2133	13.051	13.3806	12.8152	13.6633	12.0421	14.0665
1126	14.4638	14.2803	14.6538	14.0469	14.906	13.7785	15.8876
1127	11.6245	11.4818	11.7738	11.2539	11.9976	9.74963	12.0717
1128	12.7801	12.6217	12.9446	12.4878	13.0982	11.5606	13.332
1129	12.3198	12.1654	12.4811	11.9543	12.7164	10.7802	12.8876
1130	10.9277	10.7939	11.068	10.5421	11.3522	8.70386	11.4408
1131	12.7703	12.6088	12.9389	12.3687	13.2189	11.3854	13.4757
1132	13.6533	13.4803	13.8338	13.2768	14.0442	12.7187	14.6236
1133	12.356	12.206	12.5122	12.0695	12.6557	10.9482	12.8184
1134	12.7778	12.6221	12.9399	12.4197	13.1708	11.4607	13.417
1135	14.1053	13.9301	14.2883	13.7617	14.4663	13.4145	15.2373
1136	12.7802	12.6225	12.944	12.4183	13.1837	11.4586	13.4327
1137	13.2362	13.0699	13.4093	12.9166	13.587	12.1914	13.9625
1138	12.7583	12.5985	12.9244	12.4428	13.1111	11.4945	13.347
1139	12.23	12.0817	12.3822	11.8253	12.674	10.5905	12.839
1140	12.8694	12.7119	13.0311	12.4374	13.3587	11.4867	13.6518
1141	12.8554	12.6981	13.0174	12.4304	13.293	11.4763	13.5682
1142	12.576	12.4234	12.7333	12.2163	12.9792	11.162	13.1909
1143	13.6367	13.4624	13.8173	13.3221	13.9897	12.7855	14.5438
1144	12.6418	12.4842	12.804	12.2358	13.0807	11.1907	13.3115
1145	13.0759	12.9139	13.241	12.6419	13.5749	11.7881	13.9451
1146	12.722	12.5622	12.8859	12.3256	13.1408	11.3225	13.3823
1147	13.5163	13.3421	13.6951	13.0693	14.0036	12.4143	14.5648
1148	13.7022	13.5284	13.878	13.313	14.1659	12.7726	14.7993
1149	13.8064	13.6326	13.9815	13.4005	14.2308	12.8982	14.894
1150	13.1813	13.0172	13.3475	12.7671	13.6688	11.9716	14.0737
1151	13.6138	13.4436	13.7864	13.1873	14.0978	12.5873	14.6991
1152	14.3082	14.1286	14.4904	13.8385	14.8176	13.5179	15.7577
1153	14.0359	13.8561	14.2187	13.6391	14.5175	13.2442	15.3131
1154	14.1134	13.9349	14.2946	13.6871	14.6082	13.3109	15.4446
1155	14.4845	14.2989	14.6722	14.0883	14.9394	13.8285	15.936
1156	14.0155	13.8395	14.1935	13.5738	14.5113	13.149	15.304
1157	13.3421	13.1782	13.5079	12.8957	13.8146	12.1611	14.2849
1158	14.1315	13.9537	14.3129	13.7267	14.5768	13.367	15.3973
1159	13.7777	13.6008	13.9591	13.3775	14.1953	12.8635	14.8417
1160	13.7833	13.6078	13.9636	13.3949	14.2032	12.8901	14.8531
1161	15.3481	15.1482	15.5561	14.9358	15.8304	14.806	17.2419
1162	14.947	14.7518	15.1508	14.5838	15.3844	14.4069	16.5845
1163	14.4799	14.293	14.6737	14.1068	14.8946	13.8512	15.8703
1164	15.1465	14.9492	15.3515	14.7553	15.5964	14.6001	16.9019
1165	15.0512	14.8552	15.2546	14.718	15.4383	14.5575	16.6645
1166	14.6872	14.4981	14.8824	14.3204	15.0818	14.102	16.1455
1167	14.9774	14.7841	15.177	14.5955	15.3835	14.4198	16.5832
1168	15.4525	15.2532	15.6585	15.0643	15.8748	14.9543	17.3073
1169	13.7056	13.5352	13.8809	13.2571	14.1786	12.6901	14.8176
1170	14.4611	14.2796	14.6491	14.0128	14.9354	13.7378	15.9305
1171	13.4648	13.2999	13.6353	13.0951	13.8622	12.4523	14.3533
1172	15.2498	15.0542	15.4545	14.8278	15.7278	14.6823	17.0923
1173	14.0504	13.8737	14.2347	13.6288	14.4993	13.2291	15.2863
1174	14.4187	14.2377	14.6088	13.9895	14.8872	13.7094	15.8591
1175	15.4858	15.282	15.6998	15.0895	15.9274	14.9838	17.3868
1176	13.9902	13.8086	14.1816	13.5619	14.4639	13.1315	15.2339
1177	13.9386	13.7646	14.1201	13.5341	14.384	13.0905	15.1167
1178	14.565	14.3814	14.7566	14.2085	14.9642	13.9718	15.9723
1179	13.4299	13.2638	13.6032	13.0755	13.8442	12.4228	14.3273
1180	14.7774	14.5911	14.9714	14.3876	15.2024	14.1789	16.3205
1181	13.7778	13.6063	13.9565	13.4005	14.174	12.8983	14.8109
1182	13.2467	13.085	13.4148	12.9115	13.5848	12.1838	13.9592
1183	14.1572	13.981	14.3407	13.7873	14.5421	13.4491	15.3482
1184	14.5524	14.3691	14.7442	14.1036	15.0276	13.8466	16.0677
1185	14.7368	14.5501	14.9316	14.2575	15.2285	14.0273	16.3576
1186	13.5888	13.4256	13.7581	13.1268	14.0336	12.4987	14.6082
1187	14.0377	13.8611	14.2219	13.6991	14.3982	13.3278	15.1372
1188	14.6258	14.438	14.822	14.2409	15.0202	14.0087	16.0566
1189	13.0916	12.9259	13.265	12.7468	13.4599	11.9419	13.7852
1190	14.1504	13.9663	14.3441	13.7941	14.5675	13.4588	15.3841
1191	13.5902	13.4146	13.7736	13.2172	14.0072	12.6301	14.57
1192	11.7544	11.6101	11.9045	11.4554	12.1024	10.0469	12.1876
1193	14.8943	14.7176	15.0735	14.5096	15.3106	14.3203	16.4767
1194	11.2051	11.0813	11.3301	10.9339	11.4875	9.28253	11.4932
1195	13.8458	13.6869	14.0063	13.4976	14.2048	13.0388	14.8554
1196	13.8864	13.7272	14.0467	13.6035	14.1782	13.1926	14.817
1197	11.9071	11.7766	12.0384	11.6199	12.1878	10.2887	12.2889
1198	13.8284	13.671	13.9865	13.4415	14.2186	12.9572	14.8757
1199	14.5674	14.3986	14.7376	14.2188	14.903	13.9833	15.8831
1200	13.6251	13.4693	13.7819	13.3092	13.9441	12.7674	14.4763
1201	13.2304	13.0784	13.3844	12.9243	13.553	12.2031	13.9155
1202	12.5751	12.4348	12.717	12.2163	12.9499	11.162	13.1563
1203	14.3652	14.1977	14.5354	14.0403	14.6808	13.7705	15.5546
1204	14.2642	14.0962	14.4351	13.903	14.6293	13.6017	15.4766
1205	13.6217	13.46	13.7869	13.2828	13.9612	12.7279	14.5018
1206	12.8592	12.7087	13.0123	12.5719	13.1508	11.6845	13.3937
1207	12.8915	12.7406	13.0445	12.5926	13.2008	11.716	13.4535
1208	12.3807	12.2384	12.5246	12.0894	12.6942	10.9774	12.8623
1209	14.2728	14.1019	14.4463	13.9905	14.5521	13.7107	15.3624
1210	12.9506	12.7995	13.1034	12.5993	13.3128	11.7261	13.5934
1211	13.27	13.1108	13.4327	12.891	13.6652	12.1542	14.0686
1212	13.63	13.4667	13.7957	13.2389	14.0155	12.6632	14.582
1213	13.1332	12.9779	13.2904	12.7258	13.5276	11.9111	13.8781
1214	13.1921	13.0346	13.3521	12.8184	13.5667	12.0469	13.9344
1215	12.746	12.5924	12.9022	12.4651	13.0314	11.5269	13.2531
1216	13.7227	13.5532	13.8956	13.393	14.0835	12.887	14.6788
1217	14.9295	14.7406	15.1224	14.5895	15.2832	14.4131	16.4358
1218	13.8989	13.7238	14.0781	13.5335	14.2893	13.0898	14.9798
1219	13.7647	13.5917	13.942	13.4169	14.135	12.9217	14.7545
1220	12.9097	12.753	13.0692	12.5301	13.2942	11.6228	13.5698
1221	14.7312	14.5412	14.9263	14.3583	15.144	14.1453	16.2367
1222	13.6187	13.443	13.799	13.2812	13.9964	12.7256	14.554
1223	13.855	13.6773	14.0375	13.4303	14.342	12.9409	15.0572
1224	14.0753	13.8914	14.2656	13.7256	14.4673	13.3656	15.2389
1225	13.191	13.0204	13.3678	12.8251	13.5934	12.0562	13.9716
1226	12.1581	12.0057	12.3156	11.8569	12.463	10.638	12.6006
1227	15.2549	15.0519	15.4651	14.7526	15.7547	14.5969	17.1316
1228	12.1377	11.9919	12.2858	11.8275	12.4482	10.5939	12.5838
1229	13.3001	13.1402	13.4612	13.024	13.5771	12.3492	13.9481
1230	11.6841	11.5481	11.8211	11.3304	12.054	9.86339	12.1337
1231	12.9169	12.76	13.0758	12.6371	13.199	11.7812	13.4512
1232	11.8694	11.7305	12.0098	11.5316	12.1939	10.1592	12.2962
1233	13.3659	13.2002	13.5351	12.977	13.7478	12.2812	14.1887
1234	13.7455	13.5743	13.9205	13.3025	14.1879	12.758	14.8308
1235	13.5068	13.3362	13.6817	13.1279	13.8962	12.5005	14.4038
1236	13.5601	13.3904	13.7334	13.1371	13.9833	12.5137	14.5344
1237	14.3437	14.1569	14.5361	13.8199	14.8817	13.4943	15.8508
1238	12.5539	12.4012	12.7093	12.1431	12.9985	11.0559	13.2134
1239	13.8227	13.6468	14.0032	13.3669	14.286	12.8485	14.9747
1240	13.3555	13.1859	13.5295	12.8645	13.8431	12.1152	14.3257
1241	13.4309	13.2598	13.6068	12.9491	13.9169	12.2394	14.4358
1242	13.299	13.1327	13.4702	12.8894	13.7141	12.1516	14.1388
1243	13.4153	13.2437	13.5925	12.9796	13.8494	12.2848	14.3349
1244	12.509	12.3552	12.667	12.0409	12.9658	10.9063	13.1747
1245	13.3225	13.1526	13.4975	12.8675	13.7746	12.1197	14.2277
1246	12.4359	12.2823	12.5932	11.9934	12.9048	10.8374	13.1052
1247	12.4256	12.272	12.5831	12.0008	12.8623	10.8479	13.0559
1248	12.4275	12.2724	12.5879	12.0335	12.8261	10.8954	13.0156
1249	12.7751	12.6141	12.9411	12.394	13.1655	11.4229	13.4105
1250	13.2405	13.0704	13.415	12.8281	13.6898	12.0606	14.1032
1251	12.5781	12.4167	12.744	12.2027	12.9662	11.1423	13.1751
1252	12.3598	12.1989	12.5245	11.9738	12.7625	10.8088	12.9406
1253	13.4982	13.3192	13.6822	13.0568	13.9214	12.3967	14.4425
1254	13.073	12.9154	13.2296	12.6978	13.4561	11.8705	13.7803
1255	13.2449	13.0873	13.4016	12.8597	13.6037	12.1079	13.9856
1256	13.2084	13.0515	13.3648	12.8468	13.5584	12.0886	13.922
1257	14.1289	13.9551	14.3037	13.6279	14.6215	13.2276	15.4647
1258	13.1258	12.9667	13.2845	12.7712	13.4696	11.9776	13.7992
1259	12.8448	12.6905	12.9992	12.4267	13.2883	11.471	13.5623
1260	12.9483	12.7925	13.1043	12.5795	13.3466	11.696	13.6366
1261	13.4904	13.3226	13.6583	13.0056	13.9706	12.3231	14.5157
1262	12.6298	12.4772	12.7821	12.1819	13.0605	11.1117	13.2884
1263	12.5452	12.3955	12.6942	12.1263	12.9348	11.0312	13.1391
1264	12.5931	12.4435	12.7418	12.1672	13.0106	11.0901	13.2281
1265	12.6662	12.5126	12.8188	12.2519	13.0852	11.2143	13.3169
1266	13.5698	13.404	13.7346	13.1314	13.991	12.5056	14.5457
1267	13.1293	12.974	13.2831	12.5935	13.634	11.7173	14.0272
1268	14.014	13.8435	14.183	13.5703	14.4738	13.1439	15.2485
1269	14.8272	14.6433	15.0087	14.3973	15.2575	14.1904	16.3989
1270	14.2352	14.0578	14.4108	13.8452	14.6366	13.5277	15.4875
1271	14.1023	13.926	14.2774	13.6757	14.5556	13.2948	15.3674
1272	14.2243	14.0465	14.401	13.7598	14.6844	13.4117	15.5599
1273	13.8558	13.6819	14.029	13.4839	14.2439	13.0189	14.9135
1274	12.8629	12.7021	13.0239	12.5415	13.2041	11.6394	13.4577
1275	13.7057	13.5311	13.8782	13.2727	14.1212	12.713	14.7344
1276	13.4017	13.2322	13.5697	12.9703	13.8501	12.2705	14.3359
1277	12.6816	12.5249	12.8372	12.3219	13.0362	11.3171	13.2591
1278	12.7508	12.593	12.9086	12.348	13.1578	11.3552	13.4019
1279	13.5875	13.4182	13.7559	13.0966	14.0838	12.4544	14.6793
1280	13.8085	13.636	13.9803	13.4089	14.2129	12.911	14.8673
1281	13.192	13.0256	13.3572	12.7855	13.6304	11.9985	14.0221
1282	12.8555	12.695	13.0155	12.4621	13.2673	11.5222	13.5364
1283	13.9535	13.7771	14.1295	13.5637	14.3717	13.1339	15.0988
1284	13.7017	13.5308	13.872	13.3102	14.088	12.7687	14.685
1285	13.9558	13.7822	14.128	13.5495	14.3905	13.1144	15.1261
1286	13.7705	13.6009	13.9389	13.3071	14.2203	12.7644	14.8782
1287	14.2944	14.1153	14.4729	13.851	14.7311	13.5348	15.6304
1288	13.538	13.3705	13.706	13.1093	13.9826	12.4729	14.5334
1289	13.811	13.6379	13.9841	13.4163	14.2155	12.9208	14.8711
1290	13.3399	13.1747	13.5051	12.9567	13.7421	12.2506	14.1798
1291	13.3611	13.1952	13.5282	13.0671	13.668	12.4112	14.0725
1292	12.8912	12.7352	13.0486	12.6267	13.1613	11.766	13.4059
1293	13.6216	13.4548	13.789	13.1947	14.0487	12.5978	14.6302
1294	12.7553	12.5982	12.9136	12.3986	13.1387	11.4297	13.3798
1295	14.273	14.0941	14.453	13.8734	14.6789	13.5639	15.5517
1296	12.4763	12.3192	12.6354	12.1311	12.836	11.038	13.0261
1297	13.1994	13.0325	13.3673	12.8751	13.5506	12.1307	13.912
1298	13.2232	13.0611	13.387	12.8658	13.6001	12.1173	13.9803
1299	13.5775	13.4138	13.7437	13.2181	13.9796	12.6316	14.529
1300	13.9913	13.8229	14.1627	13.4894	14.4718	13.0264	15.2455
1301	13.0408	12.8849	13.1996	12.6527	13.4222	11.8038	13.7344
1302	13.9952	13.8268	14.1672	13.5873	14.3994	13.1687	15.1389
1303	13.7118	13.5462	13.8811	13.3205	14.1394	12.7833	14.761
1304	13.2467	13.0885	13.4083	12.8632	13.6583	12.1132	14.06
1305	13.775	13.6086	13.9451	13.3447	14.2337	12.8185	14.8986
1306	14.2952	14.1225	14.4715	13.8735	14.7288	13.564	15.627
1307	13.4116	13.2528	13.5731	13.0078	13.8068	12.3262	14.2737
1308	13.3981	13.2388	13.5604	12.9696	13.8157	12.2696	14.2864
1309	12.5068	12.357	12.6605	12.096	12.9389	10.9871	13.1437
1310	14.3089	14.1353	14.4858	13.9255	14.6832	13.6295	15.5582
1311	13.6801	13.5126	13.8507	13.3424	14.0092	12.815	14.5729
1312	13.5332	13.3755	13.6932	13.1634	13.9374	12.5511	14.4661
1313	12.8936	12.756	13.0299	12.5512	13.2413	11.6537	13.5031
1314	12.8886	12.7519	13.0247	12.5437	13.2573	11.6428	13.5233
1315	14.6793	14.5211	14.8366	14.293	15.1029	14.0692	16.1761
1316	15.2278	15.0655	15.3902	14.7705	15.6912	14.6176	17.0392
1317	13.1376	12.9996	13.2757	12.8325	13.4591	12.0674	13.7842
1318	14.318	14.1632	14.4733	13.95	14.6772	13.6598	15.5491
1319	13.7297	13.5896	13.8676	13.3866	14.0557	12.8779	14.6403
1320	14.2581	14.1155	14.398	13.9462	14.5833	13.6554	15.4071
1321	12.7638	12.6412	12.8846	12.4399	13.1068	11.4903	13.3417
1322	13.1756	13.0476	13.3018	12.8219	13.5475	12.0517	13.9071
1323	13.096	12.968	13.2223	12.8236	13.369	12.0542	13.6646
1324	13.3659	13.2338	13.4968	13.07	13.6632	12.4152	14.0663
1325	13.4964	13.362	13.6302	13.1969	13.797	12.6011	14.2595
1326	13.4122	13.2799	13.5438	13.1112	13.7183	12.4756	14.1451
1327	14.5268	14.3802	14.6728	14.2009	14.8509	13.9621	15.806
1328	11.9491	11.8323	12.0654	11.6041	12.3129	10.2655	12.4296
1329	13.237	13.1031	13.3707	12.8678	13.6136	12.1201	13.9994
1330	12.2388	12.1185	12.3591	12.0145	12.4774	10.8676	12.6171
1331	14.3627	14.2151	14.5102	13.9709	14.7725	13.6867	15.6919
1332	12.8438	12.7155	12.9724	12.5581	13.1383	11.6639	13.3793
1333	12.2522	12.1304	12.3743	11.995	12.5336	10.8397	12.6803
1334	14.4283	14.2796	14.5776	14.0927	14.7824	13.8341	15.7066
1335	13.7513	13.6101	13.8934	13.4409	14.101	12.9564	14.704
1336	13.4088	13.2739	13.5447	13.0987	13.7543	12.4575	14.1984
1337	12.9205	12.789	13.0537	12.5426	13.3347	11.6411	13.6221
1338	13.4679	13.3325	13.6055	13.1424	13.8231	12.5215	14.2969
1339	13.6622	13.5248	13.8017	13.3026	14.0354	12.7582	14.6107
1340	13.9681	13.8277	14.1105	13.6483	14.313	13.2566	15.0159
1341	13.0366	12.9062	13.1686	12.6198	13.4968	11.756	13.8355
1342	13.7949	13.6546	13.937	13.4572	14.1275	12.9793	14.7433
1343	14.2858	14.1411	14.4326	13.9789	14.5846	13.6965	15.4091
1344	13.3109	13.1803	13.4436	13.0055	13.592	12.323	13.9698
1345	12.8637	12.738	12.9912	12.6175	13.1155	11.7525	13.3518
1346	11.9117	11.7966	12.0282	11.642	12.1897	10.3213	12.2912
1347	13.5577	13.4223	13.6958	13.2623	13.8445	12.6974	14.3278
1348	12.3863	12.2679	12.5067	12.1052	12.6775	11.0006	12.8429
1349	11.5862	11.4775	11.6966	11.3364	11.8244	9.87216	11.874
1350	12.8126	12.6885	12.9388	12.4353	13.2078	11.4836	13.4614
1351	14.0792	13.934	14.2262	13.6435	14.5234	13.2502	15.3217
1352	13.4264	13.2909	13.5634	13.0094	13.8344	12.3283	14.3126
1353	12.9367	12.8076	13.0671	12.6459	13.2251	11.7939	13.4834
1354	14.1736	14.03	14.3187	13.8063	14.5375	13.4763	15.3417
1355	13.4351	13.3003	13.5705	13.0481	13.8116	12.3845	14.2807
1356	13.665	13.5272	13.8037	13.2639	14.0434	12.6996	14.6224
1357	13.7068	13.5707	13.8438	13.3429	14.0756	12.8157	14.668
1358	12.8813	12.7551	13.0083	12.5705	13.223	11.6824	13.4808
1359	13.6157	13.4811	13.7513	13.2703	13.9817	12.7095	14.532
1360	13.2435	13.1135	13.3745	12.9095	13.5969	12.181	13.9761
1361	13.7507	13.6141	13.8883	13.3992	14.1218	12.8963	14.7351
1362	13.6414	13.5049	13.7792	13.3226	13.991	12.7864	14.5457
1363	11.5743	11.4633	11.6859	11.2896	11.8996	9.80266	11.9606
1364	14.215	14.0723	14.3587	13.8684	14.5761	13.557	15.3964
1365	14.4031	14.2585	14.5487	14.0439	14.7761	13.7748	15.6973
1366	14.725	14.576	14.8742	14.3533	15.1136	14.14	16.192
1367	13.1044	12.9717	13.2371	12.7341	13.5233	11.9234	13.8716
1368	14.6712	14.5197	14.8231	14.3321	15.0452	14.1153	16.0934
1369	13.3729	13.2361	13.5095	13.0345	13.7636	12.3645	14.2116
1370	13.3376	13.2009	13.4743	12.9755	13.7509	12.2788	14.1935
1371	14.614	14.4624	14.7658	14.3012	14.953	14.0788	15.9555
1372	15.1158	14.9574	15.2741	14.7362	15.4957	14.5779	16.7513
1373	13.5261	13.3858	13.6664	13.1571	13.9296	12.5422	14.455
1374	14.7534	14.5972	14.9098	14.3692	15.172	14.1576	16.2769
1375	12.93	12.7949	13.065	12.5838	13.3292	11.7026	13.615
1376	13.8355	13.6885	13.9827	13.4776	14.2393	13.0096	14.9068
1377	13.0803	12.9419	13.2186	12.689	13.5334	11.858	13.886
1378	12.8666	12.7303	13.0033	12.4575	13.314	11.5154	13.5947
1379	13.8063	13.6577	13.9554	13.4209	14.219	12.9279	14.8763
1380	13.3522	13.2083	13.4963	12.9612	13.7991	12.2575	14.2627
1381	14.3268	14.1698	14.4837	13.9366	14.7726	13.6435	15.692
1382	13.866	13.7154	14.016	13.5007	14.2988	13.0434	14.9943
1383	14.4954	14.3384	14.65	14.1419	14.9058	13.8923	15.8874
1384	14.0379	13.8863	14.1872	13.6637	14.437	13.2778	15.1946
1385	12.4887	12.3527	12.6224	12.069	12.9572	10.9474	13.1649
1386	13.9682	13.8144	14.1195	13.5796	14.384	13.1569	15.1166
1387	14.016	13.8598	14.17	13.5817	14.4894	13.1598	15.2716
1388	13.5467	13.3966	13.6954	13.1478	14.0151	12.529	14.5814
1389	12.626	12.4898	12.7606	12.298	12.977	11.2821	13.1883
1390	13.068	12.9252	13.2095	12.703	13.4722	11.8779	13.8024
1391	13.8702	13.7149	14.0242	13.5272	14.2529	13.0816	14.9266
1392	13.445	13.2937	13.5954	13.0963	13.8419	12.454	14.3238
1393	12.6429	12.5039	12.781	12.3121	13.0136	11.3026	13.2317
1394	12.3831	12.2466	12.519	12.0204	12.7734	10.8762	12.9535
1395	12.649	12.511	12.7859	12.3148	13.0082	11.3067	13.2252
1396	13.4927	13.3478	13.6364	13.1752	13.8419	12.5698	14.3239
1397	12.8131	12.6766	12.9484	12.4757	13.1637	11.5429	13.4086
1398	13.104	12.963	13.2434	12.7638	13.4723	11.9668	13.8026
1399	13.6804	13.531	13.8279	13.298	14.098	12.7514	14.6994
1400	13.082	12.942	13.2204	12.7419	13.4404	11.9348	13.7585
1401	13.9082	13.7562	14.0586	13.4973	14.3595	13.0383	15.0815
1402	14.3314	14.1719	14.489	13.9178	14.7764	13.62	15.6977
1403	13.5819	13.432	13.7304	13.2265	13.9662	12.645	14.5091
1404	14.8807	14.7121	15.0481	14.4639	15.3538	14.2672	16.539
1405	13.9522	13.7939	14.1092	13.5113	14.4433	13.0585	15.2032
1406	14.8183	14.6471	14.9883	14.3683	15.289	14.1566	16.4445
1407	14.4639	14.2959	14.6314	14.0586	14.9112	13.7925	15.8956
1408	14.1786	14.0143	14.3425	13.7734	14.6062	13.4301	15.4416
1409	14.0054	13.8434	14.1665	13.5527	14.4548	13.1194	15.2203
1410	13.9629	13.7992	14.126	13.554	14.3852	13.1211	15.1184
1411	15.6089	15.4218	15.7948	15.1926	16.058	15.0991	17.5799
1412	13.6374	13.4761	13.7977	13.2275	14.0608	12.6466	14.6475
1413	14.845	14.668	15.0197	14.4104	15.2997	14.2054	16.4606
1414	13.7128	13.5512	13.8725	13.3235	14.1133	12.7877	14.7225
1415	14.6278	14.4533	14.7999	14.2391	15.0502	14.0067	16.1006
1416	14.277	14.1087	14.4426	13.8739	14.7141	13.5646	15.6048
1417	13.6657	13.5033	13.8258	13.2728	14.0717	12.7132	14.6626
1418	14.1475	13.9793	14.3131	13.7843	14.5236	13.4452	15.3219
1419	14.0087	13.8388	14.1761	13.6764	14.3418	13.2958	15.0569
1420	13.6011	13.4363	13.7637	13.2848	13.9352	12.7311	14.4629
1421	14.6085	14.429	14.7855	14.2805	14.9623	14.054	15.9695
1422	13.3121	13.1517	13.471	12.9977	13.6528	12.3105	14.0526
1423	13.7386	13.572	13.904	13.415	14.095	12.919	14.6952
1424	14.9837	14.7955	15.1721	14.6257	15.3839	14.453	16.5838
1425	14.6866	14.5027	14.8707	14.311	15.0685	14.0904	16.1266
1426	14.3082	14.1299	14.4863	13.9935	14.6454	13.7147	15.5009
1427	14.5717	14.3924	14.7499	14.2019	14.9481	13.9635	15.9482
1428	13.9031	13.7316	14.074	13.5688	14.244	13.1417	14.9137
1429	14.7723	14.5872	14.9563	14.3753	15.1311	14.1648	16.218
1430	13.5301	13.3622	13.698	13.1743	13.8695	12.5686	14.3632
1431	14.4096	14.2307	14.5875	14.0227	14.7743	13.7497	15.6946
1432	14.8471	14.6627	15.0299	14.3862	15.3168	14.1773	16.4856
1433	14.3059	14.1273	14.4836	13.8983	14.7233	13.5962	15.6187
1434	15.2376	15.0428	15.4313	14.7952	15.6779	14.646	17.0201
1435	14.9039	14.7155	15.0917	14.5064	15.3039	14.3168	16.4669
1436	14.1458	13.9685	14.3249	13.7722	14.5273	13.4284	15.3271
1437	14.2934	14.117	14.4706	13.8701	14.7194	13.5593	15.6129
1438	13.1034	12.9443	13.2641	12.7553	13.4508	11.9543	13.7724
1439	13.5133	13.3469	13.6824	13.1181	13.935	12.4857	14.4627
1440	13.1047	12.9454	13.2662	12.7885	13.436	12.0027	13.7526
1441	14.0127	13.8409	14.1865	13.6364	14.391	13.2405	15.1268
1442	13.4501	13.2837	13.6198	13.1121	13.814	12.477	14.284
1443	13.4875	13.3215	13.657	13.1728	13.815	12.5662	14.2854
1444	13.3919	13.2283	13.5584	13.1241	13.6652	12.4945	14.0687
1445	13.7833	13.6135	13.9563	13.4311	14.1235	12.9421	14.7374
1446	13.4415	13.2779	13.6074	13.1123	13.7605	12.4773	14.2071
1447	13.1991	13.0371	13.3636	12.8764	13.5272	12.1326	13.8775
1448	13.9061	13.7333	14.0827	13.5605	14.2905	13.1296	14.9816
1449	13.3973	13.2329	13.5647	13.063	13.748	12.4056	14.189
1450	14.7946	14.6075	14.9852	14.395	15.1998	14.1876	16.3168
1451	13.9007	13.7269	14.0781	13.5167	14.2968	13.0663	14.9912
1452	13.9674	13.7916	14.1464	13.5475	14.3888	13.1112	15.1237
1453	10.9695	10.8388	11.1029	10.7134	11.2351	8.95883	11.3087
1454	12.9509	12.7902	13.1148	12.5737	13.3395	11.6872	13.628
1455	12.5356	12.3796	12.6942	12.1837	12.8912	11.1145	13.0889
1456	12.6218	12.466	12.7795	12.196	13.0544	11.1326	13.2809
1457	12.5013	12.3536	12.6494	12.0685	12.9195	10.9467	13.1225
1458	12.3217	12.1766	12.4682	11.9549	12.6827	10.7811	12.8488
1459	12.5805	12.4316	12.7298	12.214	12.94	11.1587	13.1449
1460	12.8064	12.6536	12.9605	12.4783	13.1427	11.5467	13.3845
1461	12.5226	12.3742	12.6723	12.2026	12.8563	11.1422	13.0488
1462	12.2989	12.1514	12.448	12.0037	12.6102	10.8521	12.7662
1463	11.9924	11.8495	12.1372	11.6987	12.3089	10.4052	12.4253
1464	12.6412	12.4908	12.7931	12.3013	12.9724	11.2869	13.1827
1465	13.3747	13.213	13.5374	12.9499	13.7934	12.2405	14.2544
1466	12.5525	12.4005	12.7059	12.208	12.9169	11.1499	13.1194
1467	12.8714	12.7145	13.0301	12.578	13.1848	11.6939	13.4342
1468	13.8171	13.6465	13.9894	13.3949	14.1997	12.8901	14.8482
1469	13.4373	13.2695	13.6071	13.0912	13.7884	12.4465	14.2476
1470	14.1374	13.9595	14.317	13.794	14.4684	13.4587	15.2405
1471	13.2125	13.0469	13.3797	12.9497	13.4827	12.2403	13.8168
1472	12.9547	12.7942	13.1164	12.6516	13.2532	11.8023	13.5179
1473	12.3592	12.2049	12.5152	12.1324	12.6214	11.0398	12.7795
1474	13.3007	13.132	13.4709	12.9511	13.6518	12.2422	14.0513
1475	13.0709	12.9065	13.2367	12.6979	13.4332	11.8707	13.7489
1476	12.3547	12.1975	12.5149	12.07	12.6624	10.949	12.8259
1477	13.1406	12.9708	13.3133	12.7609	13.5389	11.9624	13.8944
1478	12.3587	12.2005	12.5195	12.0569	12.6696	10.9297	12.8342
1479	13.741	13.5567	13.9283	13.3591	14.1125	12.8384	14.7213
1480	13.0958	12.921	13.274	12.7833	13.4274	11.9953	13.7415
1481	13.6686	13.485	13.8553	13.3297	14.0096	12.7966	14.5734
1482	13.4884	13.3076	13.6715	13.1428	13.8361	12.522	14.3151
1483	12.3449	12.1812	12.5114	12.0425	12.6392	10.9086	12.7997
1484	13.7442	13.5581	13.9329	13.3836	14.1091	12.8737	14.716
1485	14.7211	14.5157	14.9296	14.2928	15.1377	14.0689	16.2275
1486	13.2789	13.0982	13.462	12.9325	13.6352	12.216	14.0287
1487	13.2656	13.0878	13.4454	12.8586	13.6523	12.1061	14.0519
1488	13.2439	13.0605	13.4301	12.881	13.6134	12.1391	13.9991
1489	13.4843	13.2977	13.6738	13.0842	13.8738	12.436	14.3698
1490	14.3743	14.1734	14.5777	13.9843	14.7553	13.7034	15.6663
1491	14.27	14.0695	14.4736	13.9021	14.6495	13.6007	15.5071
1492	14.4932	14.2905	14.6982	14.131	14.8603	13.8791	15.8197
1493	13.337	13.1595	13.515	13.0338	13.6558	12.3635	14.0566
1494	14.5469	14.3495	14.7448	14.1269	14.9661	13.8741	15.9751
1495	13.5811	13.4013	13.7605	13.2615	13.8797	12.6963	14.3784
1496	14.6537	14.4662	14.8376	14.2529	15.0747	14.0221	16.1354
1497	12.2602	12.1096	12.4078	11.9415	12.5923	10.7608	12.7456
1498	13.1981	13.0343	13.3586	12.8425	13.5802	12.0824	13.9525
1499	13.332	13.1685	13.4926	12.9937	13.6858	12.3047	14.0977
1500	13.6955	13.5251	13.8632	13.3106	14.0722	12.7693	14.6632
1501	13.7852	13.6149	13.9524	13.4141	14.1661	12.9179	14.7995
1502	13.8713	13.6992	14.0407	13.5142	14.2507	13.0627	14.9233
1503	13.8796	13.7103	14.0465	13.5429	14.2257	13.1038	14.886
1504	13.5356	13.3712	13.6978	13.1981	13.8779	12.6027	14.3757
1505	14.3758	14.1993	14.5498	13.973	14.7665	13.6891	15.6829
1506	14.4369	14.2588	14.6119	14.0663	14.7963	13.802	15.7268
1507	11.9913	11.8486	12.132	11.6192	12.3966	10.2877	12.525
1508	14.301	14.1279	14.4713	13.8766	14.7094	13.5682	15.5978
1509	13.2721	13.1114	13.4304	12.9071	13.6544	12.1775	14.0548
1510	13.4042	13.2423	13.5638	13.0711	13.7529	12.4168	14.1965
1511	13.9018	13.7303	14.0711	13.5233	14.285	13.0758	14.9731
1512	13.4057	13.242	13.5673	13.0953	13.7205	12.4526	14.1486
1513	14.1048	13.9322	14.2748	13.7577	14.4554	13.4091	15.2213
1514	13.0382	12.8818	13.1927	12.7159	13.3296	11.8966	13.6154
1515	14.4573	14.2799	14.6319	14.0587	14.8287	13.7925	15.7739
1516	12.6003	12.4503	12.7488	12.2601	12.9244	11.2264	13.1277
1517	13.1453	12.9892	13.299	12.8235	13.4949	12.054	13.8332
1518	13.9555	13.7882	14.1203	13.6455	14.2784	13.253	14.9636
1519	13.3976	13.2371	13.5556	13.0603	13.7542	12.4017	14.1982
1520	12.7754	12.6252	12.9237	12.4577	13.0996	11.5156	13.3335
1521	13.6689	13.507	13.8292	13.3154	14.0523	12.7761	14.6355
1522	13.1684	13.0153	13.3199	12.8401	13.5176	12.0789	13.8638
1523	12.6932	12.5487	12.8359	12.374	13.0088	11.3931	13.2258
1524	12.1612	12.0249	12.2964	11.8845	12.4491	10.6781	12.5849
1525	13.3358	13.1838	13.4866	13.0381	13.6505	12.3701	14.0495
1526	12.8291	12.6846	12.9724	12.5657	13.1011	11.675	13.3351
1527	13.2493	13.101	13.3962	12.9396	13.5701	12.2267	13.939
1528	13.0137	12.8668	13.1594	12.7264	13.3188	11.9119	13.6013
1529	13.7507	13.5928	13.9071	13.3541	14.1449	12.8318	14.769
1530	12.8672	12.7185	13.0146	12.5885	13.1614	11.7098	13.4059
1531	13.3072	13.1531	13.4597	12.939	13.6632	12.2258	14.0663
1532	14.5431	14.3733	14.7119	14.1535	14.951	13.907	15.9525
1533	14.6498	14.4778	14.8203	14.26	15.0734	14.0302	16.1335
1534	14.1996	14.0315	14.3663	13.803	14.6424	13.4716	15.4963
1535	13.0576	12.9045	13.2097	12.6915	13.4406	11.8615	13.7588
1536	13.5328	13.3754	13.6891	13.1294	13.9499	12.5027	14.4843
1537	14.7128	14.5422	14.8824	14.3738	15.0957	14.163	16.1653
1538	14.5722	14.4035	14.7402	14.2563	14.8993	14.026	15.8775
1539	14.2406	14.0789	14.4019	13.9135	14.5758	13.615	15.3959
1540	13.754	13.5996	13.9087	13.4162	14.1252	12.9206	14.7401
1541	14.2727	14.1123	14.4337	13.9178	14.6342	13.6199	15.484
1542	13.2431	13.0962	13.3907	12.9171	13.587	12.1923	13.9625
1543	13.3676	13.2231	13.5119	13.0881	13.6626	12.442	14.0655
1544	12.7144	12.5805	12.8483	12.4281	13.0166	11.473	13.2352
1545	15.0928	14.9286	15.2563	14.7405	15.4562	14.5825	16.6916
1546	13.5091	13.3647	13.6533	13.2275	13.7917	12.6466	14.252
1547	14.0813	13.9277	14.235	13.7802	14.3853	13.4395	15.1185
1548	13.6739	13.524	13.8237	13.3794	13.9736	12.8667	14.5202
1549	13.4081	13.2612	13.5547	13.123	13.7028	12.4928	14.1218
1550	12.8484	12.7124	12.9835	12.5692	13.1419	11.6804	13.3837
1551	13.8405	13.6919	13.9879	13.5328	14.1576	13.0889	14.7873
1552	13.7816	13.6345	13.9277	13.4632	14.1239	12.9888	14.738
1553	13.9095	13.7616	14.0562	13.5954	14.2404	13.1803	14.9084
1554	13.6871	13.5418	13.8308	13.4108	13.9916	12.9135	14.5466
1555	13.5446	13.4003	13.6878	13.2811	13.8373	12.7254	14.317
1556	13.4785	13.3343	13.6216	13.1888	13.783	12.5893	14.2396
1557	12.884	12.7475	13.0199	12.585	13.189	11.7044	13.4389
1558	15.2921	15.1268	15.4569	14.9646	15.6208	14.8389	16.9373
1559	13.4594	13.3183	13.6003	13.1926	13.7402	12.5948	14.1769
1560	13.2833	13.143	13.4236	12.9825	13.5885	12.2889	13.9646
1561	14.365	14.2128	14.517	14.0475	14.6937	13.7792	15.574
1562	13.2151	13.0732	13.357	12.9421	13.5113	12.23	13.8551
1563	14.8512	14.6856	15.0169	14.564	15.1542	14.3825	16.2514
1564	15.3794	15.2076	15.5515	15.0943	15.6879	14.9895	17.0344
1565	14.3931	14.2362	14.551	14.0839	14.7209	13.823	15.6152
1566	13.9586	13.8086	14.1095	13.6501	14.2909	13.2592	14.9822
1567	12.4298	12.2983	12.5631	12.1423	12.7436	11.0546	12.9193
1568	13.3879	13.2424	13.5355	13.1066	13.6803	12.4691	14.0902
1569	14.898	14.7314	15.067	14.6049	15.2087	14.4301	16.3295
1570	13.27	13.1222	13.4202	13.0035	13.5637	12.3198	13.9298
1571	13.5791	13.4309	13.7301	13.2514	13.9144	12.6817	14.4319
1572	13.9522	13.7956	14.112	13.6734	14.233	13.2917	14.8974
1573	13.0359	12.8905	13.184	12.7778	13.3004	11.9873	13.577
1574	13.2577	13.111	13.4074	12.9728	13.5372	12.2745	13.8917
1575	13.7099	13.5531	13.87	13.4381	13.9902	12.9523	14.5445
1576	13.7464	13.591	13.9051	13.4492	14.0517	12.967	14.6347
1577	13.7339	13.5779	13.8938	13.4239	14.0453	12.9321	14.6252
1578	13.2319	13.0822	13.3858	12.973	13.4864	12.2749	13.8217
1579	13.4559	13.304	13.6122	13.1757	13.7434	12.5705	14.1818
1580	12.4152	12.2771	12.5571	12.1424	12.6955	11.0547	12.8639
1581	13.0576	12.9106	13.209	12.7421	13.3715	11.9352	13.668
1582	13.6937	13.5365	13.8561	13.3923	13.9876	12.8858	14.5405
1583	14.0235	13.8632	14.1886	13.6847	14.3597	13.3074	15.0818
1584	12.8746	12.7218	13.0329	12.537	13.1898	11.6329	13.4398
1585	13.4632	13.3046	13.6275	13.1948	13.74	12.598	14.1766
1586	14.2154	14.0554	14.3795	13.831	14.5986	13.5079	15.4303
1587	12.2825	12.1476	12.4211	11.9845	12.5919	10.8245	12.7451
1588	14.0431	13.8831	14.2077	13.7364	14.3607	13.3796	15.0833
1589	12.5756	12.4324	12.7234	12.2779	12.8703	11.2525	13.0648
1590	13.0186	12.8722	13.1692	12.6707	13.372	11.8306	13.6687
1591	13.4763	13.3246	13.6323	13.0799	13.8718	12.4294	14.3667
1592	13.5677	13.4152	13.7252	13.2032	13.9514	12.61	14.4866
1593	13.3347	13.1814	13.4936	13.0105	13.6797	12.3298	14.0893
1594	13.2429	13.0912	13.3998	12.9079	13.5806	12.1786	13.953
1595	13.2662	13.1116	13.4265	12.9705	13.5781	12.2708	13.9493
1596	12.5967	12.4469	12.7521	12.3072	12.8882	11.2954	13.0856
1597	13.3223	13.1647	13.4853	13.0045	13.6723	12.3214	14.0786
1598	14.5844	14.4084	14.7665	14.2398	14.9682	14.0075	15.9784
1599	14.1053	13.9372	14.2785	13.7547	14.4948	13.4048	15.2795
1600	13.7026	13.5366	13.8743	13.4151	13.9988	12.9191	14.5577
1601	11.8248	11.6877	11.9666	11.5416	12.143	10.174	12.2362
1602	13.4262	13.2652	13.5931	13.0865	13.8077	12.4395	14.275
1603	13.0395	12.8832	13.201	12.7419	13.367	11.9348	13.6622
1604	12.558	12.4091	12.7118	12.2662	12.8883	11.2353	13.0858
1605	12.2109	12.0662	12.3604	11.9325	12.5079	10.7478	12.6516
1606	12.1543	12.0072	12.3064	11.8962	12.4276	10.6951	12.5606
1607	11.5105	11.3718	11.6541	11.2202	11.8149	9.69955	11.8633
1608	11.794	11.6508	11.9425	11.5166	12.0723	10.1372	12.1538
1609	12.1832	12.0353	12.3362	11.8594	12.5459	10.6418	12.6942
1610	12.727	12.5676	12.893	12.3925	13.1064	11.4206	13.3413
1611	12.7861	12.6278	12.9501	12.4458	13.1837	11.499	13.4327
1612	13.0933	12.9372	13.2536	12.6504	13.5698	11.8006	13.9387
1613	13.4861	13.3205	13.6568	13.1154	13.9055	12.4819	14.4181
1614	11.4257	11.292	11.5634	11.0903	11.7762	9.51182	11.8196
1615	12.3372	12.1897	12.4893	12.0045	12.6924	10.8531	12.8603
1616	12.4088	12.2635	12.5578	12.0417	12.7734	10.9075	12.9534
1617	13.6585	13.4927	13.83	13.2774	14.0599	12.7197	14.6462
1618	12.4485	12.303	12.5983	12.0627	12.8286	10.9382	13.0183
1619	14.2927	14.117	14.4741	13.8729	14.7191	13.5631	15.6124
1620	12.7159	12.5623	12.8744	12.3115	13.138	11.3018	13.3789
1621	13.509	13.3427	13.6807	13.0922	13.9262	12.448	14.4499
1622	14.1201	13.945	14.3008	13.6811	14.5604	13.3022	15.3742
1623	13.4994	13.3305	13.674	13.0881	13.9183	12.442	14.438
1624	13.8974	13.7277	14.0714	13.4165	14.3691	12.9212	15.095
1625	12.7089	12.5519	12.8713	12.3157	13.1224	11.3079	13.3604
1626	14.5181	14.3356	14.7063	14.0754	14.9834	13.8127	16.0013
1627	14.2505	14.0685	14.4388	13.8513	14.6604	13.5352	15.5237
1628	14.3668	14.1843	14.5551	13.9582	14.7947	13.6708	15.7246
1629	14.7349	14.5451	14.9314	14.3209	15.1621	14.1026	16.2627
1630	13.302	13.1292	13.4827	12.9438	13.6541	12.2323	14.0544
1631	14.3552	14.1671	14.5514	13.9815	14.738	13.7	15.6406
1632	12.0109	11.8578	12.1698	11.6918	12.352	10.3949	12.4731
1633	11.2884	11.1585	11.42	10.9757	11.6013	9.34382	11.6219
1634	13.8939	13.7282	14.0613	13.5117	14.2804	13.0591	14.9664
1635	12.7112	12.5588	12.8657	12.4057	13.0163	11.4401	13.2348
1636	13.9589	13.787	14.1333	13.5937	14.3623	13.1782	15.0854
1637	13.015	12.8572	13.1753	12.6713	13.3621	11.8315	13.6561
1638	11.6947	11.5591	11.8331	11.3941	12.0051	9.95697	12.0801
1639	13.5374	13.3753	13.7021	13.1007	14.0088	12.4605	14.5723
1640	14.6618	14.4796	14.8477	14.2614	15.1102	14.0318	16.187
1641	11.4868	11.352	11.6244	11.2376	11.7601	9.72547	11.8014
1642	13.4316	13.2677	13.5981	13.0524	13.8821	12.3903	14.3821
1643	11.7981	11.6587	11.9394	11.502	12.1343	10.1158	12.2261
1644	12.6278	12.4756	12.7822	12.3258	12.9523	11.3228	13.1586
1645	12.6395	12.4889	12.7915	12.2268	13.112	11.1775	13.348
1646	12.9943	12.8371	13.1527	12.5509	13.4907	11.6533	13.8279
1647	11.5325	11.395	11.6716	11.2302	11.8719	9.71445	11.928
1648	14.271	14.0946	14.4502	13.7761	14.7725	13.4338	15.6919
1649	14.051	13.8722	14.2335	13.6138	14.5292	13.2069	15.3297
1650	13.5624	13.3953	13.7324	13.1616	13.9893	12.5485	14.5432
1651	13.8061	13.632	13.9845	13.4437	14.2025	12.96	14.8521
1652	13.9431	13.7648	14.126	13.4991	14.4348	13.041	15.1916
1653	12.7084	12.5522	12.8691	12.3492	13.1101	11.357	13.3458
1654	13.2705	13.1071	13.4385	12.8386	13.7606	12.0767	14.2072
1655	14.2232	14.0409	14.4125	13.8332	14.6547	13.5109	15.5151
1656	13.6545	13.4831	13.8317	13.2918	14.0335	12.7416	14.608
1657	13.9899	13.8148	14.1704	13.6297	14.3878	13.2303	15.1221
1658	14.3821	14.1965	14.5743	14.0145	14.7837	13.74	15.7084
1659	13.8656	13.6941	14.0427	13.5237	14.2477	13.0764	14.919
1660	14.1543	13.9783	14.3353	13.7267	14.5843	13.367	15.4086
1661	13.8901	13.7172	14.0694	13.4942	14.309	13.0334	15.0098
1662	13.1756	13.0113	13.3464	12.784	13.5853	11.9963	13.9601
1663	12.4956	12.3409	12.6561	12.1672	12.8632	11.0901	13.0571
1664	14.4533	14.2644	14.6495	14.0104	14.9244	13.735	15.9152
1665	14.4185	14.2318	14.6116	14.0085	14.872	13.7329	15.8367
1666	13.1457	12.9826	13.3137	12.7543	13.5491	11.9528	13.9096
1667	12.5404	12.3936	12.6906	12.2109	12.9055	11.1542	13.106
1668	13.0646	12.9112	13.2206	12.7381	13.4128	11.9293	13.7214
1669	12.2392	12.0957	12.3866	11.9132	12.5665	10.7198	12.7171
1670	12.9077	12.7567	13.0626	12.6168	13.215	11.7515	13.4708
1671	13.9182	13.7525	14.088	13.5935	14.2576	13.1778	14.9334
1672	12.6234	12.4782	12.7733	12.3296	12.9289	11.3285	13.1325
1673	12.6385	12.4883	12.7938	12.3433	12.9419	11.3484	13.1472
1674	12.7855	12.6309	12.946	12.5228	13.073	11.612	13.3026
1675	12.0876	11.9437	12.2367	11.8027	12.384	10.557	12.5099
1676	13.4053	13.2437	13.5718	13.0776	13.7442	12.4258	14.1831
1677	13.8473	13.6762	14.0247	13.5161	14.2309	13.0655	14.8942
1678	13.3278	13.1688	13.4924	12.9969	13.6831	12.3093	14.0942
1679	13.01	12.8547	13.1706	12.7487	13.2898	11.9447	13.5641
1680	12.7197	12.5683	12.8772	12.4173	13.0536	11.4571	13.28
1681	13.4176	13.2595	13.5818	13.0696	13.7966	12.4147	14.2589
1682	12.7202	12.57	12.8771	12.4262	13.0279	11.4702	13.2491
1683	13.5936	13.4305	13.7642	13.2874	13.9446	12.735	14.4771
1684	13.6381	13.4758	13.808	13.2792	14.0387	12.7226	14.6156
1685	13.351	13.1906	13.5188	12.9948	13.7241	12.3064	14.1543
1686	12.6262	12.477	12.7817	12.2985	12.9661	11.2828	13.175
1687	12.3914	12.2435	12.5471	12.1054	12.6957	11.0009	12.8641
1688	12.5	12.3523	12.6547	12.1631	12.863	11.0843	13.0568
1689	15.064	14.8756	15.2609	14.6681	15.4844	14.5019	16.7342
1690	13.4167	13.2534	13.5887	13.0369	13.8256	12.3684	14.3003
1691	13.5631	13.4008	13.7324	13.208	13.9472	12.6168	14.4808
1692	14.4364	14.259	14.6225	14.1022	14.7876	13.8453	15.7142
1693	14.286	14.1098	14.4715	13.967	14.6279	13.6824	15.4745
1694	13.6051	13.4388	13.7806	13.3004	13.9274	12.7551	14.4516
1695	12.409	12.2595	12.5677	12.0877	12.737	10.975	12.9116
1696	12.7947	12.6391	12.9599	12.4553	13.1456	11.5121	13.388
1697	12.4956	12.345	12.6556	12.1547	12.8896	11.0725	13.0872
1698	14.2389	14.0621	14.4257	13.8252	14.6848	13.5005	15.5605
1699	13.0672	12.9128	13.2287	12.731	13.4169	11.9187	13.7273
1700	13.9892	13.8217	14.1646	13.6156	14.3935	13.2093	15.1305
1701	12.6685	12.5186	12.826	12.3938	12.9649	11.4227	13.1737
1702	14.0818	13.9115	14.2603	13.7603	14.4298	13.4124	15.1835
1703	15.5294	15.333	15.737	15.1543	15.9539	15.056	17.4268
1704	13.0353	12.8778	13.2005	12.6932	13.3912	11.864	13.6933
1705	12.1271	11.9821	12.28	11.8542	12.4135	10.634	12.5441
1706	11.9092	11.769	12.0569	11.62	12.215	10.2889	12.3194
1707	14.3762	14.1964	14.5655	14.0208	14.7507	13.7475	15.6596
1708	11.7725	11.633	11.9204	11.4762	12.0877	10.0779	12.171
1709	12.201	12.0522	12.3601	11.8274	12.5944	10.5938	12.748
1710	12.6232	12.4703	12.7863	12.2711	13.0182	11.2425	13.2373
1711	14.0722	13.8987	14.2572	13.6884	14.4694	13.3128	15.2419
1712	13.1407	12.9773	13.3157	12.7632	13.5695	11.9659	13.9383
1713	13.6883	13.5156	13.8726	13.3288	14.0778	12.7954	14.671
1714	13.7392	13.5653	13.9253	13.3452	14.1424	12.8192	14.7653
1715	14.1762	13.9944	14.3698	13.8128	14.5663	13.4851	15.3825
1716	13.0441	12.8806	13.2184	12.7375	13.3566	11.9284	13.6489
1717	13.1322	12.9683	13.3069	12.7812	13.4879	11.9923	13.8237
1718	12.4158	12.2626	12.5793	12.1273	12.707	11.0326	12.8772
1719	12.1082	11.9576	12.2694	11.7821	12.463	10.5271	12.6006
1720	12.1229	11.9762	12.2789	11.7573	12.4967	10.4912	12.6391
1721	12.955	12.7932	13.1274	12.5628	13.363	11.6708	13.6572
1722	12.9864	12.8222	13.162	12.6294	13.3656	11.77	13.6604
1723	12.9698	12.8049	13.1465	12.5929	13.3614	11.7165	13.6552
1724	12.8176	12.6552	12.9906	12.4963	13.163	11.5732	13.4079
1725	13.7626	13.5834	13.9536	13.4441	14.0981	12.9605	14.6996
1726	13.5948	13.4181	13.7836	13.2272	13.9828	12.6462	14.5336
1727	13.7433	13.5599	13.9398	13.4448	14.0738	12.9614	14.6655
1728	11.9276	11.7758	12.0897	11.623	12.2451	10.2934	12.3545
1729	12.9667	12.8009	13.1431	12.6065	13.3334	11.7367	13.6204
1730	13.7386	13.5662	13.9213	13.3761	14.1137	12.8615	14.7232
1731	12.7554	12.5909	12.9314	12.4224	13.102	11.4647	13.3361
1732	13.8445	13.6644	14.0367	13.4876	14.2197	13.0241	14.8772
1733	12.818	12.6566	12.9902	12.4943	13.1607	11.5702	13.4052
1734	12.9581	12.7943	13.1326	12.5595	13.3916	11.6659	13.6938
1735	13.1594	13.0064	13.3179	12.7749	13.5488	11.9831	13.9093
1736	14.5697	14.3925	14.7541	14.1791	14.9832	13.9358	16.001
1737	12.9844	12.8324	13.142	12.6703	13.3121	11.8301	13.5924
1738	14.1042	13.9347	14.2796	13.7799	14.4717	13.4391	15.2454
1739	12.8471	12.6936	13.0058	12.5504	13.1518	11.6525	13.3948
1740	13.4779	13.3156	13.6456	13.1517	13.8248	12.5345	14.2993
1741	12.6445	12.4936	12.8008	12.356	12.9667	11.3669	13.1758
1742	12.5543	12.4045	12.7094	12.2355	12.8904	11.1902	13.0881
1743	12.8819	12.7274	13.0419	12.4973	13.28	11.5745	13.5518
1744	13.7834	13.6144	13.9582	13.3981	14.1874	12.8946	14.8302
1745	13.1265	12.964	13.2949	12.7473	13.4945	11.9426	13.8327
1746	13.6697	13.495	13.8519	13.3252	14.019	12.7901	14.5871
1747	13.0766	12.9117	13.2483	12.7294	13.4451	11.9164	13.7647
1748	12.9641	12.8019	13.1323	12.6622	13.2719	11.8178	13.5421
1749	13.6204	13.4472	13.8001	13.2471	14.0064	12.6753	14.5689
1750	13.4157	13.2461	13.5911	13.0313	13.8116	12.3598	14.2805
1751	13.7357	13.5595	13.918	13.3971	14.0744	12.8933	14.6663
1752	14.1827	13.9981	14.3738	13.7751	14.5769	13.4325	15.3974
1753	13.5356	13.3552	13.7238	13.1372	13.9298	12.5138	14.4551
1754	14.1563	13.9655	14.3549	13.7707	14.5176	13.4265	15.3133
1755	14.4937	14.2953	14.7012	14.1256	14.8709	13.8727	15.835
1756	13.2785	13.1013	13.4632	12.9707	13.5802	12.2712	13.9525
1757	14.8085	14.6031	15.0241	14.4434	15.1719	14.2439	16.2768
1758	14.1395	13.9418	14.3479	13.7222	14.5339	13.3604	15.3362
1759	13.913	13.7252	14.1092	13.5373	14.2809	13.0953	14.9672
1760	14.783	14.5752	15.0005	14.4177	15.1533	14.2144	16.25
1761	15.4613	15.237	15.6976	15.0858	15.8483	14.9794	17.268
1762	13.9823	13.7848	14.1901	13.5921	14.3717	13.176	15.0988
1763	13.9232	13.7284	14.1284	13.5697	14.2847	13.1431	14.9728
1764	13.5266	13.3384	13.7242	13.1746	13.8865	12.569	14.3889
1765	13.5136	13.3191	13.719	13.0689	13.9392	12.4137	14.4689
1766	14.8936	14.6718	15.1278	14.4933	15.3125	14.3015	16.4795
1767	13.8701	13.6769	14.0713	13.4691	14.2757	12.9975	14.9596
1768	12.7406	12.5676	12.9201	12.3903	13.0877	11.4174	13.3197
1769	12.705	12.5332	12.8836	12.2824	13.1293	11.2591	13.3683
1770	13.6768	13.4858	13.8759	13.2967	14.0886	12.7494	14.6859
1771	13.0972	12.9129	13.2892	12.6652	13.5779	11.8223	13.9492
1772	11.7201	11.561	11.8857	11.3801	12.0796	9.93646	12.1618
1773	14.2687	14.0669	14.4783	13.9002	14.6687	13.5984	15.5362
1774	13.731	13.5385	13.93	13.3719	14.1035	12.8559	14.7077
1775	14.5782	14.3667	14.7986	14.1613	15.0402	13.9154	16.0863
1776	15.2816	15.0569	15.5156	14.8579	15.7158	14.7172	17.0749
1777	13.1427	12.9576	13.3343	12.7966	13.5085	12.014	13.8516
1778	13.7583	13.5569	13.9664	13.404	14.1246	12.9035	14.7392
1779	14.5208	14.3031	14.7467	14.1056	14.9614	13.8498	15.968
1780	14.1676	13.9591	14.3834	13.7812	14.5821	13.4408	15.4053
1781	13.3053	13.1128	13.5035	12.9132	13.7126	12.1862	14.1367
1782	13.3816	13.2036	13.5604	13.027	13.7513	12.3535	14.1942
1783	12.6862	12.518	12.8558	12.3618	13.0414	11.3753	13.2651
1784	13.0922	12.9188	13.2682	12.7854	13.4215	11.9984	13.7335
1785	13.0738	12.9029	13.2469	12.7172	13.4459	11.8985	13.7657
1786	13.4186	13.2416	13.5969	13.0527	13.8022	12.3906	14.2672
1787	12.3653	12.2071	12.5246	12.0016	12.7442	10.849	12.92
1788	13.4939	13.3183	13.671	13.115	13.8724	12.4812	14.3677
1789	14.6624	14.468	14.8586	14.2124	15.1485	13.9765	16.2431
1790	11.8721	11.7249	12.0196	11.493	12.2501	10.1026	12.3601
1791	13.6216	13.4439	13.8013	13.2289	14.0308	12.6487	14.604
1792	13.2539	13.0871	13.4221	12.9178	13.6109	12.1933	13.9952
1793	13.7227	13.5479	13.8986	13.3955	14.0469	12.891	14.6276
1794	14.026	13.8456	14.2081	13.6346	14.4223	13.2379	15.172
1795	13.62	13.4456	13.7958	13.2837	13.9579	12.7293	14.4966
1796	13.7814	13.6065	13.9573	13.4577	14.1326	12.9801	14.7509
1797	13.2432	13.0767	13.4112	12.9679	13.5282	12.2672	13.8789
1798	13.8967	13.7191	14.0756	13.5484	14.2494	13.1126	14.9215
1799	13.9813	13.8037	14.1607	13.6424	14.342	13.2487	15.0572
1800	12.4783	12.3252	12.6324	12.1911	12.7812	11.1253	12.9626
1801	13.4749	13.3048	13.6469	13.1705	13.7778	12.5623	14.2323
1802	12.4782	12.3249	12.6326	12.1945	12.7584	11.1304	12.9357
1803	13.2782	13.1134	13.4443	12.9816	13.5747	12.2876	13.9448
1804	14.3692	14.1864	14.5539	14.0327	14.7285	13.7614	15.6265
1805	13.2422	13.0773	13.409	12.9356	13.5328	12.2209	13.885
1806	13.2742	13.1106	13.4392	12.9587	13.5963	12.2537	13.9753
1807	13.0655	12.9056	13.2269	12.7727	13.3555	11.9798	13.6475
1808	14.0213	13.8502	14.1939	13.702	14.3478	13.3319	15.0653
1809	12.9744	12.82	13.1301	12.7068	13.2305	11.8833	13.4899
1810	12.5287	12.3778	12.6817	12.2309	12.8353	11.1835	13.0255
1811	13.3084	13.1489	13.4696	13.0093	13.6289	12.3282	14.02
1812	11.5537	11.4206	11.6889	11.3128	11.7955	9.83722	11.8414
1813	13.4115	13.2487	13.5776	13.1234	13.7037	12.4934	14.1232
1814	13.6074	13.4455	13.7717	13.2497	13.9619	12.6792	14.503
1815	13.3394	13.1818	13.4993	13.0428	13.6337	12.3767	14.0268
1816	13.1797	13.0224	13.3394	12.8777	13.4756	12.1343	13.807
1817	13.0784	12.9236	13.236	12.7977	13.3716	12.0157	13.6682
1818	13.2611	13.1033	13.422	12.954	13.5699	12.2465	13.9388
1819	14.8225	14.6411	15.0082	14.5217	15.1338	14.3346	16.222
1820	13.9091	13.7418	14.0803	13.5922	14.2251	13.1761	14.885
1821	11.6505	11.5149	11.7895	11.3581	11.9457	9.90417	12.0126
1822	13.4433	13.2829	13.6078	13.1076	13.77	12.4707	14.2211
1823	13.9744	13.8066	14.1471	13.6324	14.3018	13.2351	14.9989
1824	13.6166	13.4573	13.7804	13.3456	13.8934	12.8197	14.3994
1825	12.6807	12.5368	12.8286	12.401	12.9563	11.4332	13.1637
1826	14.6773	14.5038	14.8568	14.3554	15.011	14.1424	16.0427
1827	13.5796	13.4222	13.7425	13.3034	13.8686	12.7593	14.3619
1828	13.8636	13.7051	14.0263	13.5764	14.1608	13.1524	14.7919
1829	13.2619	13.112	13.4162	13.0207	13.5155	12.3443	13.861
1830	13.001	12.8577	13.1478	12.7366	13.2594	11.9271	13.5258
1831	15.7984	15.62	15.9809	15.4823	16.1078	15.4327	17.6531
1832	13.231	13.084	13.3814	12.977	13.4844	12.2811	13.8189
1833	13.0059	12.8639	13.1514	12.7455	13.2786	11.9399	13.5502
1834	13.071	12.9289	13.217	12.8241	13.3319	12.0547	13.6184
1835	12.9189	12.781	13.0598	12.678	13.167	11.8417	13.4124
1836	12.5564	12.424	12.6918	12.3491	12.7748	11.3569	12.9551
1837	12.574	12.442	12.7091	12.3441	12.8098	11.3496	12.9967
1838	12.5921	12.4587	12.7288	12.3655	12.8235	11.3807	13.0126
1839	12.3332	12.2028	12.467	12.0938	12.5772	10.9839	12.7289
1840	13.0051	12.8667	13.1464	12.7463	13.2762	11.9411	13.5475
1841	12.9299	12.7931	13.0695	12.6531	13.206	11.8045	13.4594
1842	13.8878	13.7427	14.0345	13.641	14.1294	13.2469	14.7462
1843	13.5146	13.374	13.6568	13.2464	13.768	12.6744	14.2183
1844	14.7397	14.5836	14.8981	14.4448	15.0325	14.2455	16.0751
1845	13.9009	13.7554	14.0488	13.6218	14.1659	13.2183	14.7993
1846	14.2924	14.1424	14.4451	14.0166	14.5605	13.7425	15.3744
1847	14.6568	14.5029	14.8139	14.3888	14.9184	14.1804	15.9065
1848	13.3534	13.2188	13.4894	13.1423	13.5754	12.5214	13.9458
1849	12.6168	12.4908	12.744	12.3894	12.8396	11.416	13.03
1850	14.1737	14.0287	14.3204	13.926	14.4251	13.63	15.1761
1851	12.9443	12.8149	13.0753	12.7276	13.1552	11.9138	13.3988
1852	14.5605	14.4121	14.711	14.3153	14.8205	14.0955	15.762
1853	14.3016	14.1559	14.4498	14.0848	14.52	13.824	15.3169
1854	15.163	15.0061	15.3228	14.9115	15.4248	14.7779	16.6441
1855	14.0786	13.9344	14.2254	13.8349	14.3148	13.5133	15.0186
1856	12.0269	11.9064	12.1501	11.7966	12.2609	10.5481	12.3724
1857	13.6467	13.5074	13.7891	13.388	13.8957	12.8799	14.4031
1858	14.5648	14.4137	14.7192	14.2844	14.8495	14.0585	15.8041
1859	12.6066	12.4791	12.7373	12.3716	12.8405	11.3896	13.0311
1860	13.5459	13.4063	13.689	13.2324	13.8467	12.6537	14.3309
1861	14.1211	13.9734	14.2726	13.8549	14.3778	13.5403	15.1077
1862	12.8088	12.6775	12.9435	12.5729	13.0437	11.686	13.2676
1863	13.0898	12.9545	13.2289	12.8625	13.3165	12.1122	13.5984
1864	12.2639	12.1381	12.3934	12.0482	12.4739	10.917	12.6129
1865	13.3143	13.1753	13.4576	13.0798	13.5551	12.4292	13.9179
1866	12.9263	12.7907	13.0663	12.6925	13.157	11.863	13.401
1867	12.4041	12.2746	12.5377	12.1972	12.619	11.1343	12.7767
1868	13.6825	13.5371	13.8325	13.4473	13.9271	12.9646	14.4512
1869	12.2967	12.1683	12.4293	12.0866	12.5262	10.9733	12.672
1870	13.3019	13.1604	13.4482	13.047	13.5679	12.3828	13.9361
1871	12.1255	12.0016	12.2531	11.9209	12.3317	10.731	12.4504
1872	13.4761	13.335	13.621	13.237	13.7232	12.6605	14.1528
1873	14.1484	13.9979	14.303	13.8982	14.3981	13.5961	15.137
1874	12.3242	12.1952	12.4568	12.1241	12.5313	11.028	12.6777
1875	13.5549	13.4107	13.7032	13.3296	13.7819	12.7965	14.2381
1876	13.7819	13.6326	13.9356	13.5483	14.0182	13.1124	14.5859
1877	11.864	11.7405	11.9906	11.6597	12.0556	10.3472	12.1354
1878	13.4936	13.3476	13.6431	13.2693	13.7182	12.708	14.1449
1879	14.2584	14.1025	14.4175	14.004	14.5194	13.7276	15.3159
1880	12.8366	12.6986	12.9774	12.6137	13.0686	11.7471	13.2975
1881	11.7237	11.5996	11.8499	11.523	11.9355	10.1466	12.0014
1882	13.8586	13.7037	14.0163	13.6083	14.1065	13.1992	14.712
1883	15.0673	14.8954	15.2426	14.7933	15.3513	14.6437	16.5354
1884	13.4502	13.2995	13.6041	13.2033	13.7127	12.6102	14.1368
1885	11.8611	11.7312	11.9939	11.6552	12.0836	10.3406	12.1664
1886	13.6012	13.4464	13.7597	13.3475	13.8761	12.8226	14.3732
1887	12.48	12.3445	12.6178	12.236	12.7335	11.1909	12.9077
1888	12.3704	12.2353	12.5082	12.1486	12.6006	11.0639	12.7549
1889	13.2848	13.1362	13.4361	13.0437	13.546	12.378	13.9048
1890	13.4574	13.3058	13.6118	13.2427	13.686	12.6689	14.098
1891	12.4919	12.3519	12.635	12.2878	12.7067	11.2671	12.8768
1892	11.4724	11.346	11.6018	11.2977	11.6692	9.81466	11.6979
1893	12.5432	12.4018	12.688	12.3361	12.752	11.3379	12.9284
1894	14.3591	14.1917	14.5309	14.0989	14.645	13.8411	15.5003
1895	14.3616	14.1944	14.5328	14.0909	14.6367	13.8318	15.4878
1896	13.6565	13.4986	13.8181	13.3876	13.9271	12.8793	14.4511
1897	14.5046	14.3328	14.6811	14.2303	14.7948	13.9968	15.7247
1898	13.5061	13.3464	13.6706	13.2606	13.7602	12.6951	14.2067
1899	11.8633	11.7269	12.0041	11.6535	12.0831	10.3381	12.1658
1900	12.589	12.4413	12.7417	12.3639	12.8202	11.3785	13.0084
1901	14.6577	14.4788	14.8426	14.3703	14.953	14.1588	15.9555
1902	11.1993	11.0686	11.3346	10.9908	11.4028	9.36591	11.497
1903	11.9295	11.7873	12.0769	11.6904	12.177	10.3928	12.276
1904	11.0966	10.9661	11.2319	10.8879	11.3249	9.21513	11.4099
1905	11.8234	11.6784	11.9745	11.5453	12.1044	10.1793	12.1901
1906	12.3707	12.219	12.5279	12.1204	12.6313	11.0228	12.7908
1907	12.4412	12.2883	12.6001	12.2046	12.6923	11.145	12.8603
1908	13.0547	12.8909	13.2248	12.8139	13.3097	12.0402	13.5897
1909	12.1232	11.9733	12.2789	11.8871	12.3697	10.682	12.4931
1910	13.2128	13.0512	13.3792	12.9401	13.5175	12.2274	13.8637
1911	12.5045	12.3542	12.6593	12.2391	12.801	11.1956	12.9858
1912	12.9531	12.7959	13.1149	12.7035	13.2307	11.8787	13.4901
1913	13.144	12.9832	13.3099	12.8648	13.4534	12.1157	13.7761
1914	13.3152	13.1526	13.4824	13.057	13.597	12.3968	13.9762
1915	13.123	12.9608	13.29	12.8784	13.3813	12.1355	13.6806
1916	13.2113	13.049	13.3778	12.9757	13.4566	12.2792	13.7808
1917	13.8755	13.7027	14.053	13.6106	14.15	13.2024	14.7764
1918	14.8026	14.6135	14.9974	14.5448	15.0752	14.3615	16.136
1919	13.5724	13.4007	13.7493	13.3173	13.844	12.7788	14.327
1920	14.4149	14.2289	14.6063	14.1508	14.7023	13.9037	15.5871
1921	13.889	13.7117	14.0713	13.6113	14.1758	13.2035	14.8136
1922	14.724	14.5331	14.9204	14.4163	15.0378	14.2127	16.0829
1923	12.2409	12.0878	12.3984	12.0206	12.4675	10.8765	12.6057
1924	14.7968	14.6028	14.9961	14.5041	15.1099	14.3138	16.1866
1925	14.7071	14.5135	14.9059	14.423	15.0033	14.2203	16.0311
1926	15.0474	14.8452	15.2558	14.7412	15.3655	14.5834	16.5563
1927	14.6744	14.4847	14.868	14.3824	14.9888	14.1727	16.0092
1928	12.9667	12.8089	13.126	12.702	13.2404	11.8765	13.502
1929	13.3736	13.2089	13.5402	13.1137	13.6483	12.4794	14.0466
1930	15.1715	14.9786	15.3667	14.8706	15.4827	14.7316	16.7316
1931	12.7432	12.586	12.9028	12.5099	12.9896	11.5931	13.2029
1932	13.5669	13.3978	13.7384	13.2975	13.846	12.7507	14.33
1933	14.6451	14.4581	14.8347	14.3691	14.9338	14.1575	15.9283
1934	15.209	15.0125	15.4084	14.9093	15.5145	14.7756	16.7796
1935	13.8243	13.649	14.0025	13.5565	14.1014	13.1245	14.7046
1936	14.2019	14.0212	14.3854	13.8865	14.5364	13.5808	15.3401
1937	16.6111	16.3873	16.8394	16.2757	16.9621	16.2363	18.9082
1938	15.1872	14.9855	15.3937	14.8976	15.4862	14.7629	16.7369
1939	15.0169	14.8173	15.2211	14.7058	15.3424	14.544	16.5226
1940	14.5381	14.3467	14.7339	14.2701	14.8202	14.0416	15.7616
1941	13.8884	13.708	14.0732	13.5741	14.2102	13.1494	14.8635
1942	14.5336	14.3408	14.7319	14.2517	14.8296	14.0208	15.7751
1943	14.2952	14.1059	14.4902	14.0353	14.5741	13.7644	15.3935
1944	13.8992	13.7163	14.0877	13.6473	14.1677	13.2552	14.8019
1945	14.8417	14.6427	15.047	14.5604	15.1296	14.378	16.2159
1946	14.695	14.4971	14.8998	14.4281	14.9652	14.2257	15.9738
1947	15.3557	15.1468	15.5713	15.0661	15.66	14.9563	16.994
1948	13.7545	13.5717	13.9439	13.5123	14.0142	13.0601	14.5801
1949	13.1005	12.93	13.2769	12.8453	13.3811	12.0864	13.6804
1950	14.9338	14.7336	15.141	14.6576	15.23	14.4894	16.3597
1951	13.5715	13.3926	13.7571	13.3342	13.8157	12.8033	14.2864
1952	13.3871	13.212	13.5689	13.1433	13.6433	12.5227	14.0399
1953	14.6956	14.506	14.8897	14.4403	14.9632	14.2401	15.9707
1954	13.8229	13.6459	14.0043	13.5927	14.0806	13.1768	14.6748
1955	14.4143	14.2299	14.6034	14.1618	14.6824	13.9159	15.5569
1956	13.6145	13.4435	13.7899	13.3817	13.8576	12.8705	14.3467
1957	13.6678	13.496	13.8443	13.4245	13.9107	12.933	14.4262
1958	13.7472	13.5749	13.9235	13.5007	14.0081	13.0435	14.5714
1959	14.3689	14.1845	14.5582	14.1264	14.6174	13.8735	15.4586
1960	15.0877	14.8911	15.29	14.8092	15.3597	14.6611	16.5476
1961	14.193	14.0122	14.3787	13.9384	14.4494	13.6458	15.2123
1962	12.8331	12.6727	12.9978	12.597	13.0671	11.7227	13.2955
1963	13.8424	13.6671	14.0221	13.5535	14.1388	13.1205	14.76
1964	13.0094	12.8462	13.1775	12.7932	13.2363	12.0092	13.4971
1965	12.3893	12.2365	12.5465	12.1751	12.6127	11.1018	12.7693
1966	13.7416	13.568	13.9201	13.4916	14.0011	13.0294	14.5612
1967	13.318	13.1515	13.4892	13.1001	13.5449	12.4597	13.9033
1968	12.6879	12.5326	12.8476	12.4751	12.9155	11.542	13.1177
1969	15.1365	14.9446	15.334	14.8699	15.409	14.7307	16.6209
1970	14.7175	14.5305	14.9104	14.4657	14.9804	14.2689	15.9969
1971	13.5545	13.3872	13.7269	13.3091	13.8034	12.7671	14.2688
1972	14.662	14.4799	14.8492	14.3822	14.9412	14.1724	15.9385
1973	14.103	13.9254	14.2862	13.8683	14.3496	13.5568	15.0678
1974	14.1778	14.0013	14.3594	13.9224	14.4359	13.6251	15.1931
1975	13.2354	13.0727	13.4031	13.0114	13.4698	12.331	13.7994
1976	14.2715	14.0935	14.4549	14.0406	14.525	13.7708	15.3239
1977	13.5955	13.4287	13.7677	13.3615	13.8382	12.8415	14.3185
1978	14.0452	13.8779	14.2162	13.8135	14.2866	13.4861	14.9756
1979	14.3392	14.1638	14.5191	14.1258	14.577	13.8729	15.3976
1980	15.5083	15.3216	15.6982	15.2623	15.7581	15.1822	17.1366
1981	13.4185	13.2719	13.5634	13.221	13.6275	12.6362	14.0182
1982	13.276	13.1308	13.4193	13.0842	13.4778	12.436	13.8101
1983	13.6013	13.4508	13.7497	13.3981	13.8183	12.8947	14.2902
1984	12.5823	12.446	12.7167	12.3844	12.7919	11.4085	12.9754
1985	13.3035	13.1559	13.4494	13.0978	13.5209	12.4562	13.8682
1986	14.3613	14.2003	14.5204	14.1279	14.6009	13.8752	15.4335
1987	12.5858	12.4473	12.7231	12.3964	12.7982	11.4265	12.9823
1988	13.8325	13.6771	13.9866	13.6073	14.0655	13.1979	14.654
1989	14.1973	14.0371	14.3564	13.9781	14.4397	13.6951	15.1983
1990	14.3201	14.1585	14.4808	14.0766	14.5796	13.8141	15.4014
1991	13.8497	13.6946	14.004	13.6217	14.0861	13.2181	14.6824
[truncated: 19 more rows]
