# Supplementary material for: Testing long-term summer temperature reconstruction based on maximum density chronologies obtained by reanalysis of tree-ring data sets from northernmost Sweden and Finland
Source: Copernicus journal article supplement (doi:10.5194/cp-10-1473-2014), 2014-08-05
Supplement: Supplementary file 3 [file supplement-cover-letter.pdf › supplement-cover-letter.pdf]

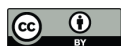

## *Supplement of*

# **Testing long-term summer temperature reconstruction based on maximum density chronologies obtained by reanalysis of tree-ring data sets from northernmost Sweden and Finland**

**V. V. Matskovsky and S. Helama**

*Correspondence to:* V. V. Matskovsky (matskovsky@igras.ru)

- Supplement-Cover-Letter.pdf
- Supplementary information.pdf
- rec\_with\_uncertainties.xls
